# Supplementary material for: Glycosylated extracellular matrix drives immune suppression by controlling T cell movement, macrophage phenotype, and macrophage-T cell crosstalk in triple negative breast cancer
Source: Research Square preprint supplement (doi:10.21203/rs.3.rs-7375429/v1), 2025-08-18
Supplement: Supplementary file 1 [file 014c45a33a2a691c90a01192.pdf]

# **Glycosylated extracellular matrix drives immune suppression by controlling T cell movement, macrophage phenotype, and macrophage-T cell crosstalk in triple negative breast cancer.**

Tyler, EJ<sup>\*1</sup>, Liu, Y<sup>\*1</sup>, Tarantola, L<sup>\*1</sup>, Maniati, E<sup>1</sup>, Thornton, K.A.<sup>1</sup>, Gauthier, V<sup>1</sup>, Hirani, P<sup>1</sup>, Burger Ramos, M<sup>1</sup>, Roth, N<sup>1</sup>, Bragg, J<sup>1</sup>, Puttock, E<sup>1</sup>, McDermott, J<sup>1</sup>, Rajeeve, V<sup>1</sup>, Cutillas, P<sup>1</sup>, Maiques, O<sup>1</sup>, Soulier, A<sup>2</sup>, Correa de Sampaio, P<sup>2</sup>, Davies, D<sup>3</sup>, Maher, J<sup>3</sup>, Haslam, SM<sup>4</sup>, Läubli, H<sup>5</sup> & Pearce, OMT<sup>1</sup>.

<sup>1</sup>Queen Mary University of London, Barts Cancer Institute, John Vane Science Centre, London EC1M 6BQ, UK.

<sup>2</sup>Neobe Therapeutics, Salisbury House, Station Road, Cambridge CB1 2LA, UK

<sup>3</sup>Leucid Bio, Guy's Hospital, Great Maze Pond, London SE1 9RT, UK.

<sup>4</sup>Department of Life Sciences, Imperial College London, London, UK

<sup>5</sup>Department of Biomedicine and Division of Medical Oncology, University Hospital Basel, Hebelstrasse 20, 4031, Basel, Switzerland



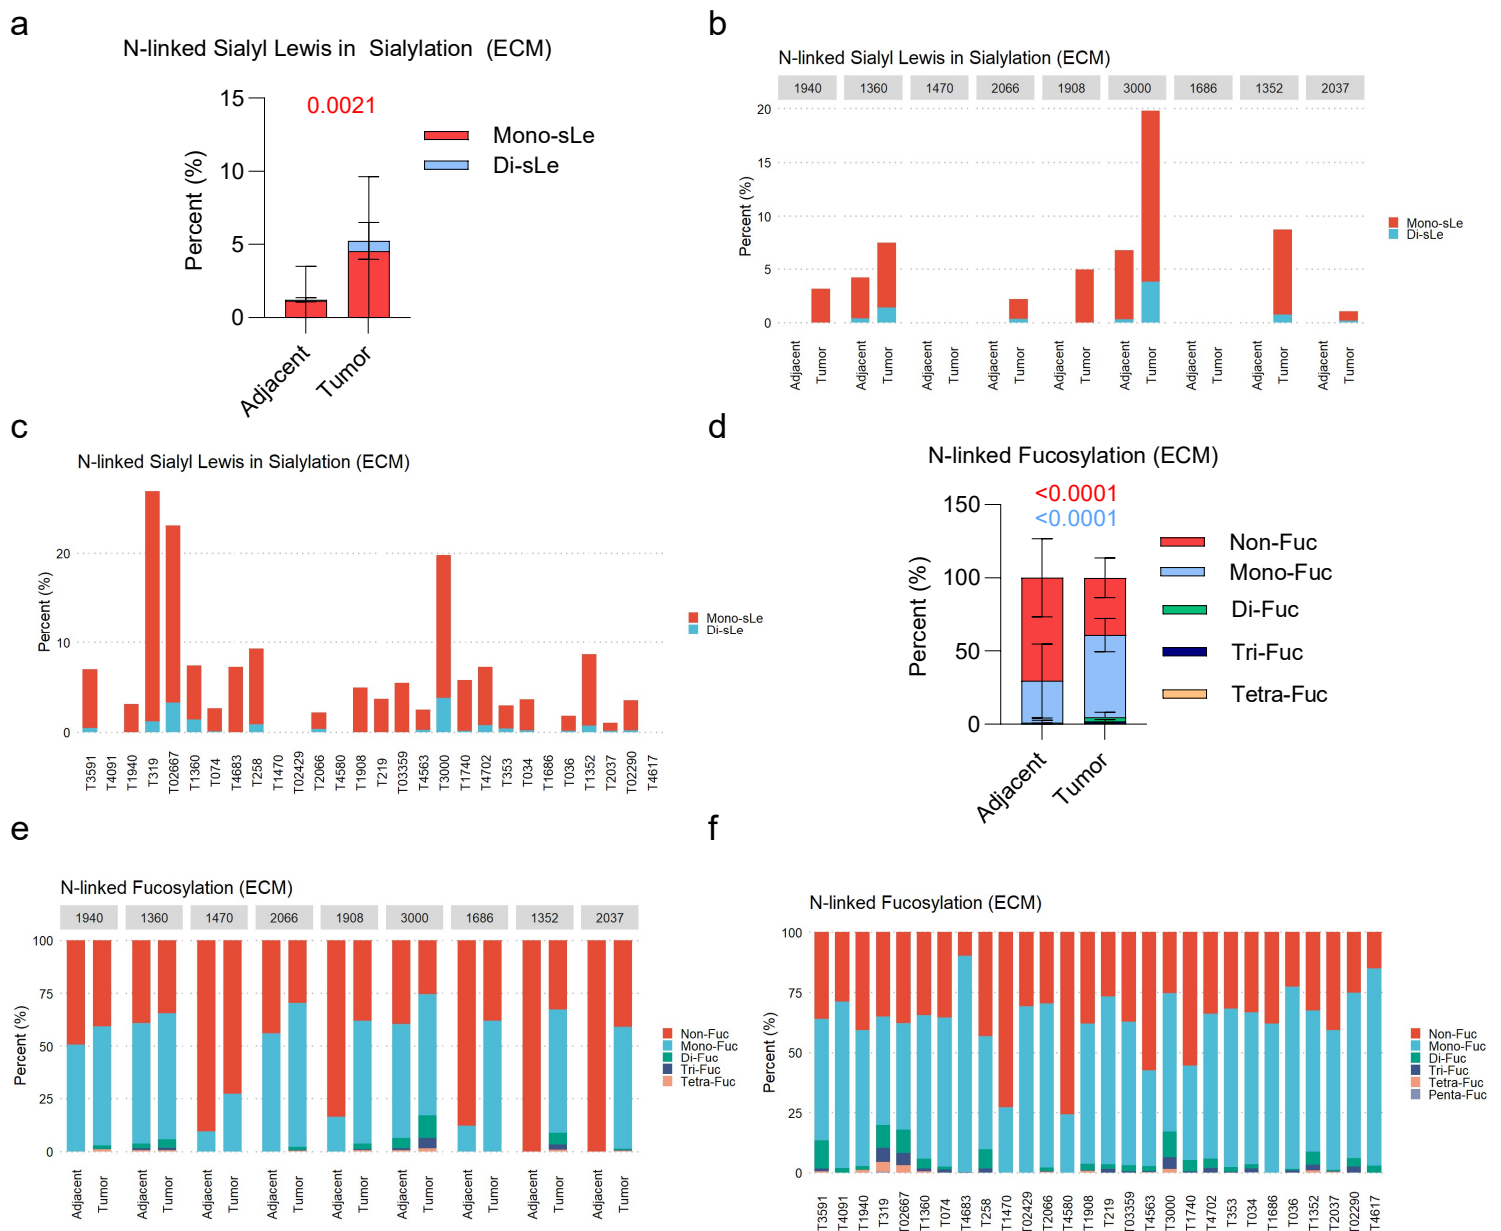

**Supplementary Fig. 2: ECM N-linked glycomics analysis.** ECM N-linked glycans assessed for **a-c**, Sialyl Lewis groups (Mono-sialyl lewis (sLe), red; Di-sLe, light blue) , **d-f**, Fucosylation (Non-fucosylation (Fuc), red; Mono-Fuc, light blue; Di-Fuc, green; Tri-Fuc, dark blue; Tetra-Fuc, peach). **a, d**, average adjacent/surround and tumor samples, Mean with SD. Two-way Repeated Measures ANOVA with Šídák's multiple comparisons test, N=9 each. N=9 each. **b, e**, paired adjacent/surround and tumor samples, N=9 each. **c, f**, all tumor samples ranked by MI. N=28.

g

## N-linked glycans with PolyLacNAc (ECM)

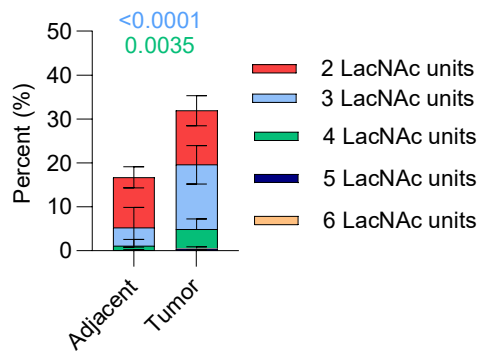

h

## N-linked glycans with Poly-LacNAc (ECM)

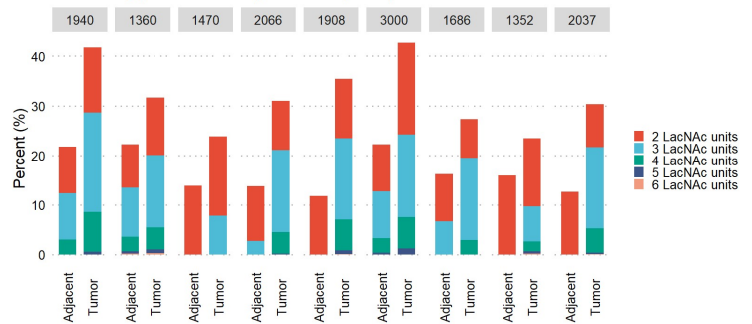

i

## N-linked glycans with Poly-LacNAc (ECM)

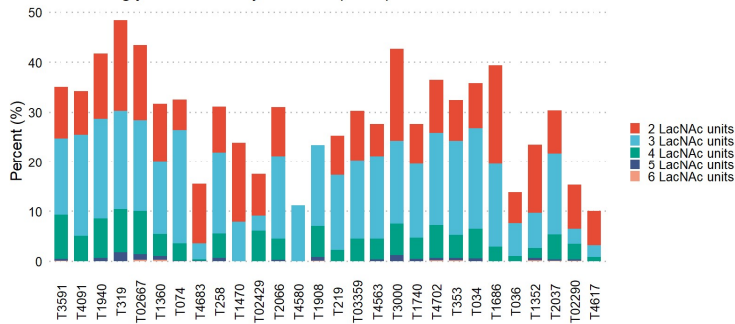

**Supplementary Fig. 2: ECM N-linked glycomics analysis.** ECM N-linked glycans assessed for **g-i**, Poly-LacNAc (2 LacNAc units, red; 3 LacNAc units, light blue; 4 LacNAc units, green; 5 LacNAc units, dark blue; 6 LacNAc units, peach) structures. **g**, average adjacent/surround and tumor samples, Mean with SD. Two-way Repeated Measures ANOVA with Šídák's multiple comparisons test, N=9 each. N=9 each. **h**, paired adjacent/surround and tumor samples, N=9 each. **i**, all tumor samples ranked by MI. N=28.



a

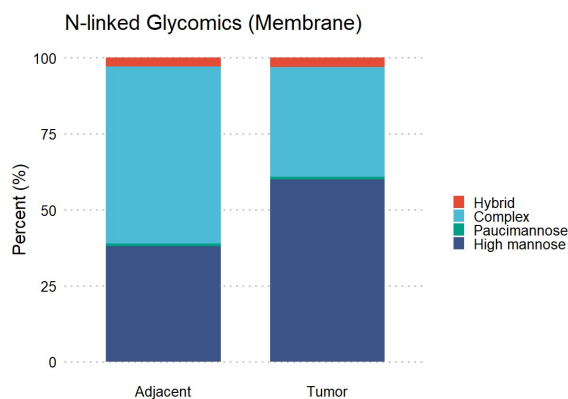

b

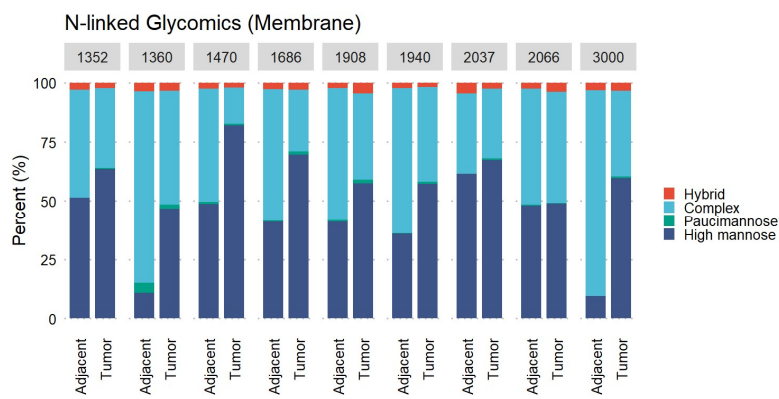

c

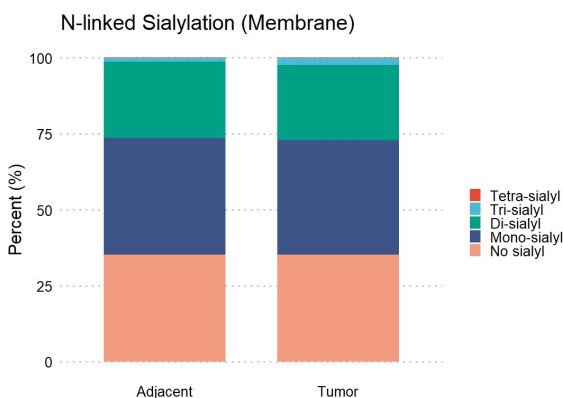

d

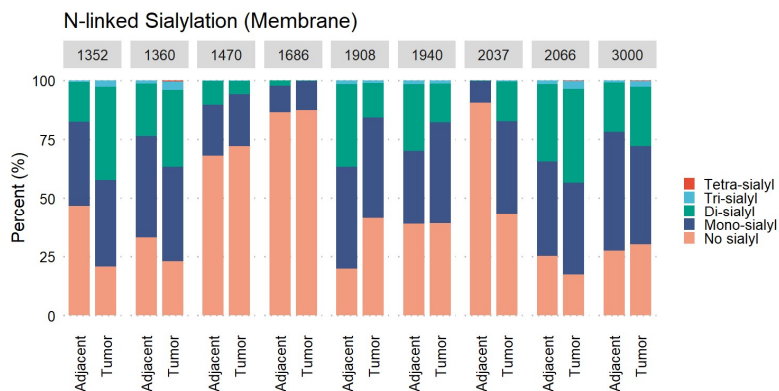

**Supplementary Fig. 3: Membrane N-linked glycomics analysis.** **a-b**, Membrane N-linked glycans assigned to four main groups (Complex, dark blue; Hybrid, green; High-mannose, light blue; Paucimannose, red). Stacked barchart displaying the proportion of each family in the N-glycome for **a**, mean adjacent/surround and tumor samples and **b**, paired adjacent/surround samples and tumor samples. N=9 adjacent/surround tissues, N=9 tumor tissues. **c-d**, Membrane N-linked complex glycans broken down into five groups (Non-Sialyl, peach; Mono-Sialyl, dark blue; Di-Sialyl, green; Tri-Sialyl, light blue; Tetra-sialyl, red). Stacked barchart displaying the proportion of each family in the N-glycome **c**, mean adjacent/surround and tumor samples and **d**, paired adjacent/surround samples and tumor samples. N=9 adjacent/surround tissues, N=9 tumor tissues.

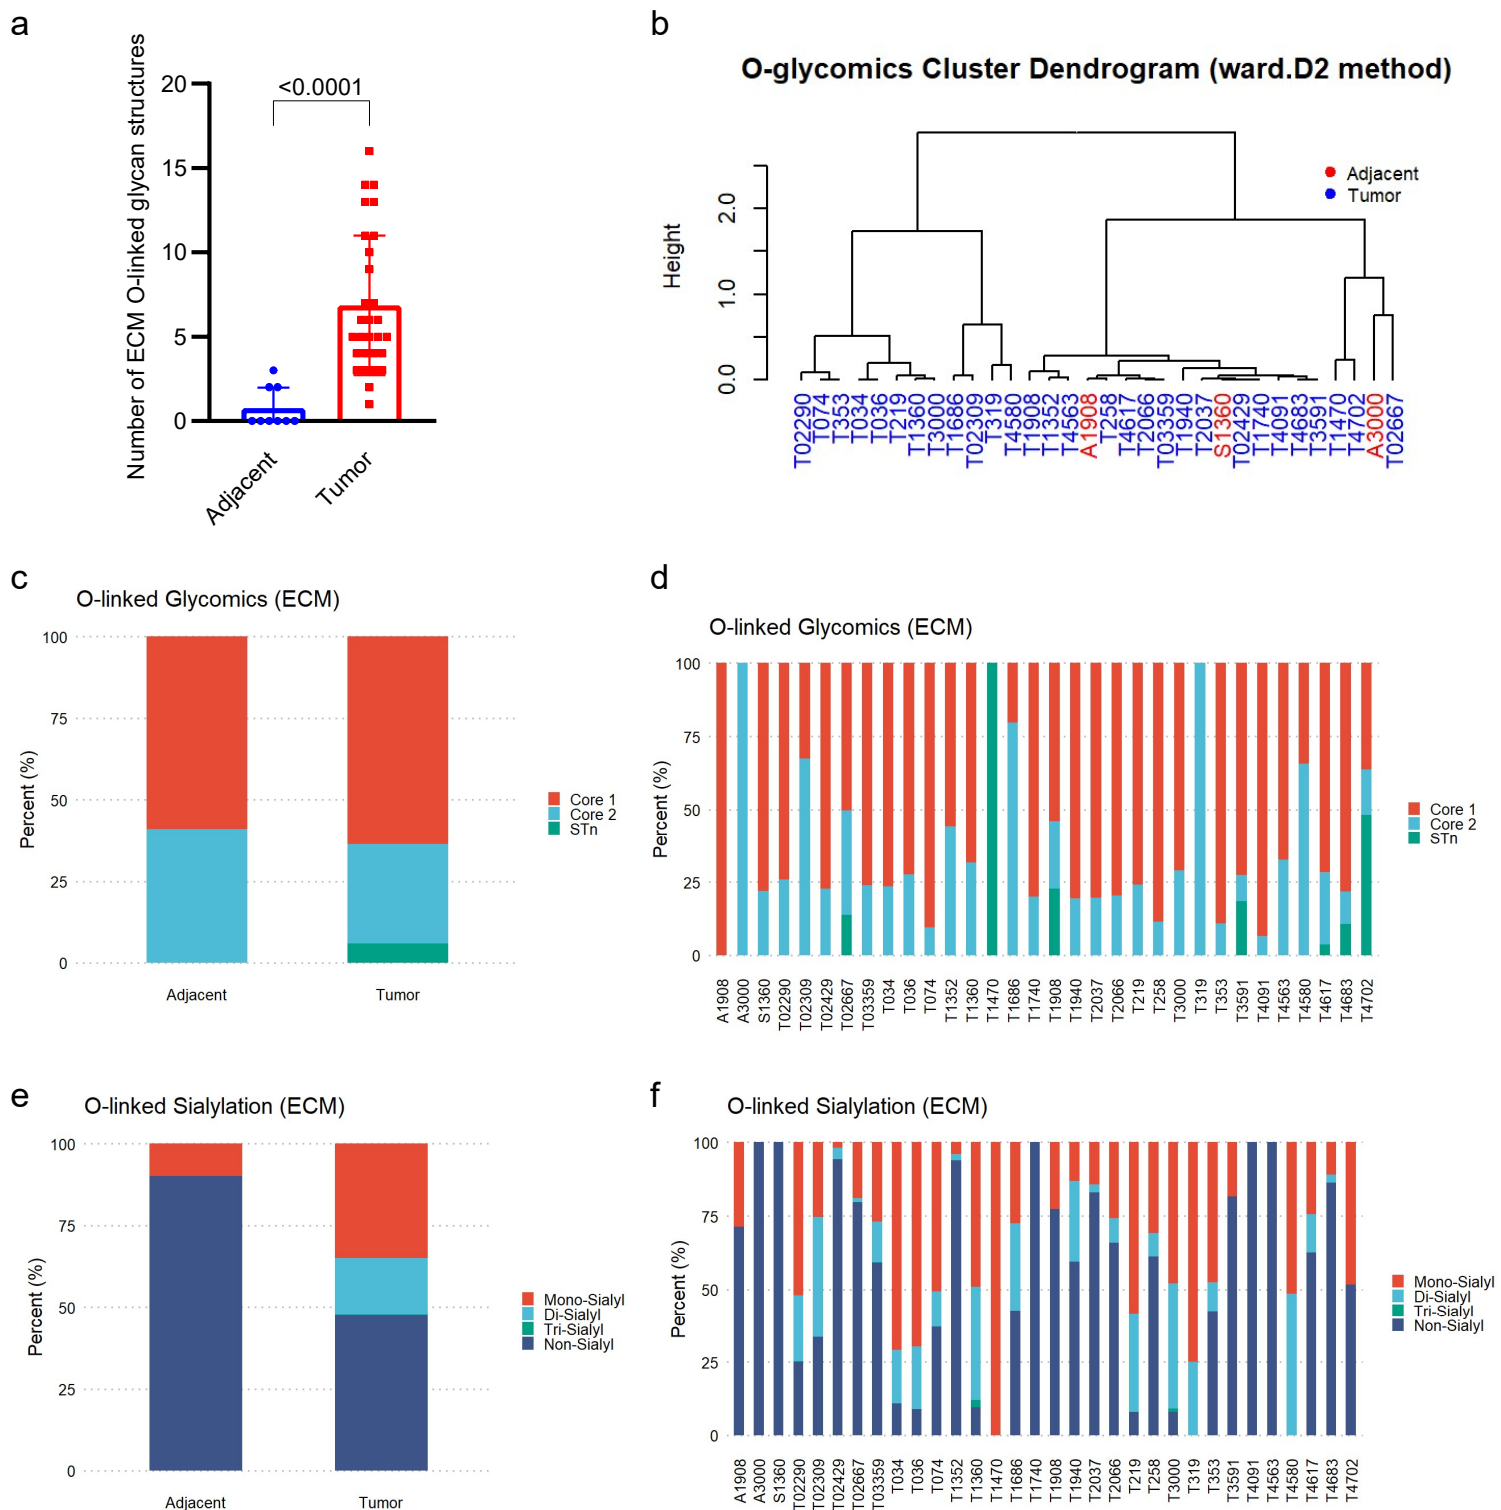

**Supplementary Fig. 4: ECM O-linked glycomics analysis.** **a**, Number of ECM O-linked glycan structures detected. Mean with SD. Mann Whitney test. N=9 for adjacent/surround ('adjacent'), N=29 for tumor tissues. **b**, Unsupervised cluster dendrogram using ECM O-linked glycan structures from adjacent/surround and tumor tissues. **c-d**, ECM O-linked glycans assigned to three main groups (Core 1, red; Core 2, light blue; STn, green). Stacked barchart displaying the proportion of each family in the O-glycome for **c**, mean adjacent/surround and tumor samples and **d**, all adjacent/surround samples and tumor samples. N=3 adjacent/surround tissues, N=29 tumor tissues. **e-f**, ECM O-linked complex glycans broken down into five groups (Non-Sialyl, dark blue; Mono-Sialyl, red; Di-Sialyl, light blue; Tri-Sialyl, green). Stacked barchart displaying the proportion of each family in the O-glycome **e**, mean adjacent/surround and tumor samples and **f**, all adjacent/surround samples and tumor samples. N=3 adjacent/surround tissues, N=29 tumor tissues.

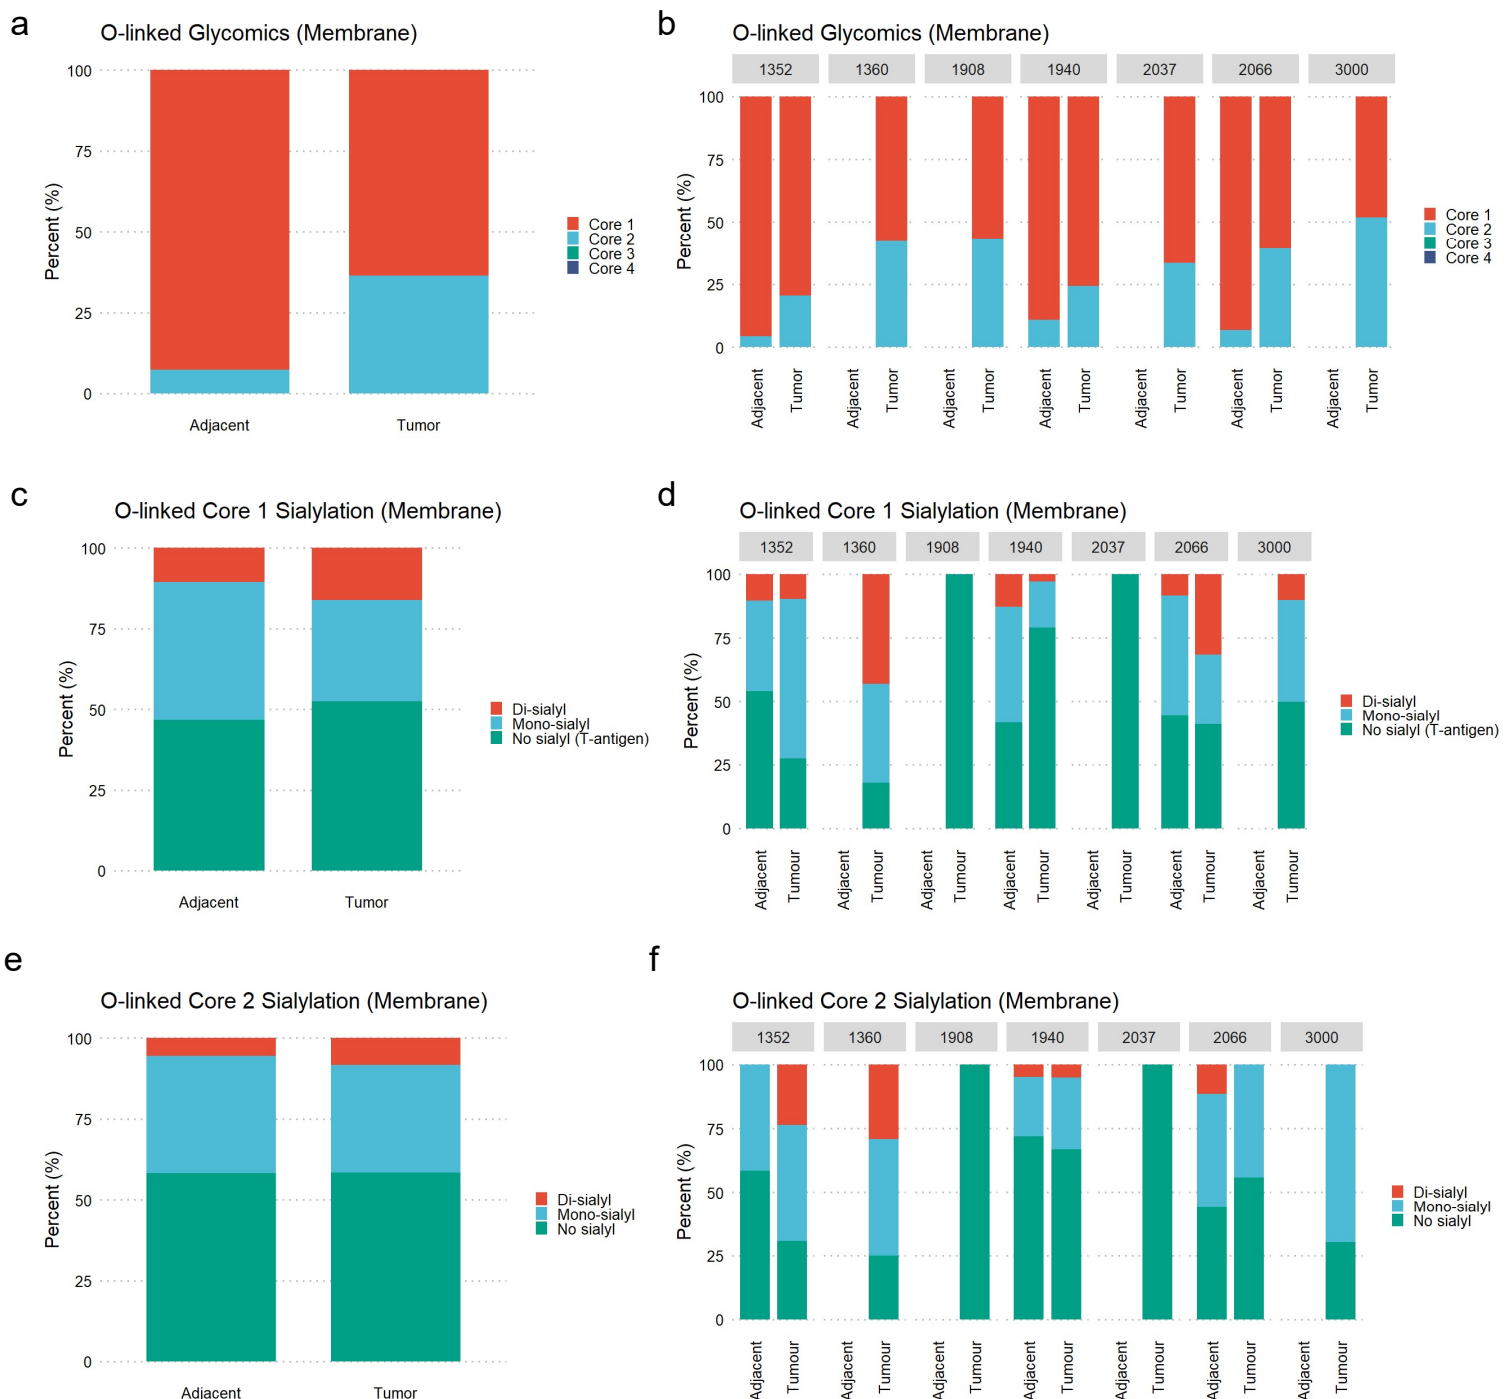

**Supplementary Fig. 5: Membrane O-linked glycomics analysis.** **a-b**, Membrane O-linked glycans assigned to four main groups (Core 1, red; Core 2, light blue; Core 3, green; Core 4, dark blue). Stacked barchart displaying the proportion of each family in the O-glycome for **a**, mean adjacent/surround and tumor samples and **b**, paired adjacent/surround samples and tumor samples. N=3 adjacent/surround tissues, N=7 tumor tissues. **c-d**, Membrane O-linked Core 1 glycans broken down into three groups (Di-sialyl, red; Mono-sialyl, blue; No Sialyl (T-antigen), green). Stacked barchart displaying the proportion of each family in the O-glycome **c**, mean adjacent/surround and tumor samples and **d**, paired adjacent/surround samples and tumor samples. N=3 adjacent/surround tissues, N=7 tumor tissues. **e-f**, Membrane O-linked Core 2 glycans broken down into three groups (Di-sialyl, red; Mono-sialyl, blue; No sialyl, green). Stacked barchart displaying the proportion of each family in the O-glycome **e**, mean adjacent/surround and tumor samples and **f**, paired adjacent/surround samples and tumor samples. N=3 adjacent/surround tissues, N=7 tumor tissues.

**a**

N-glycan, O-glycan & lectin

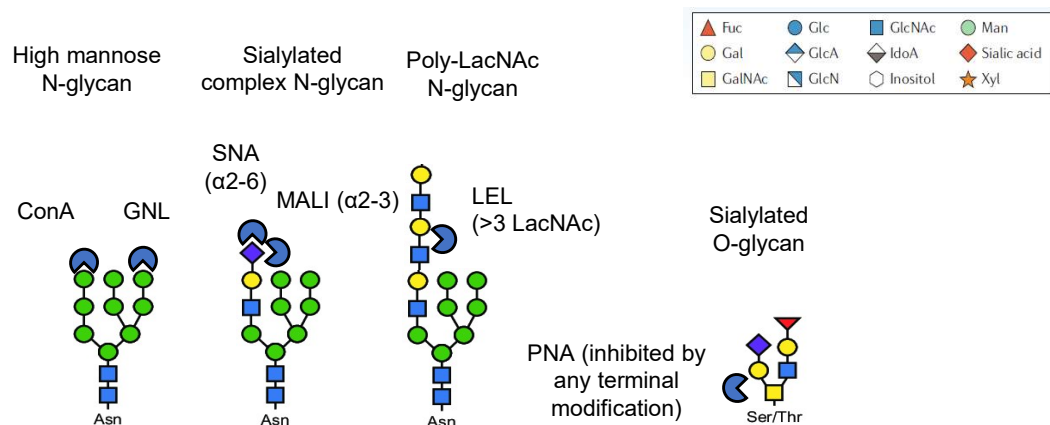

**b**

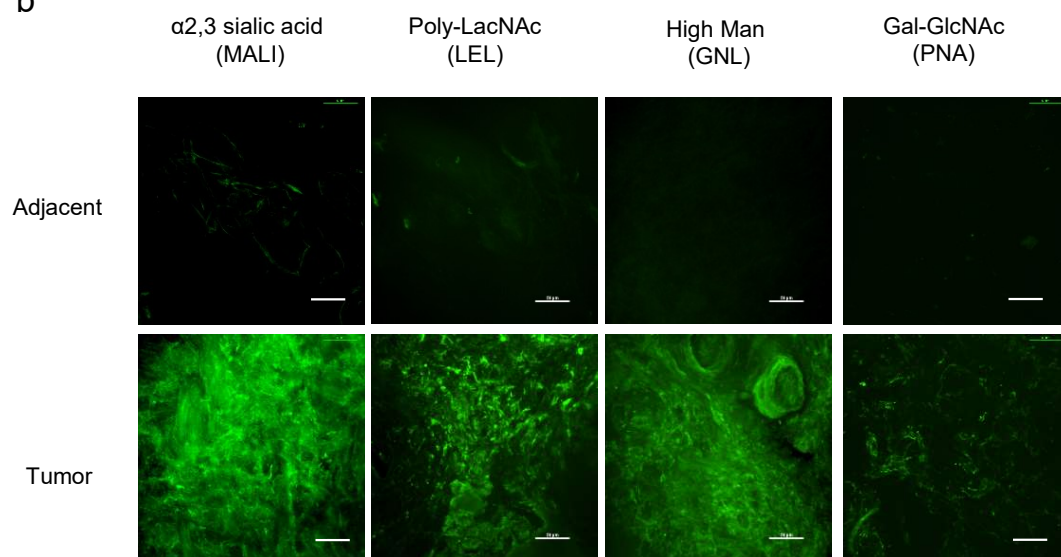

**c**

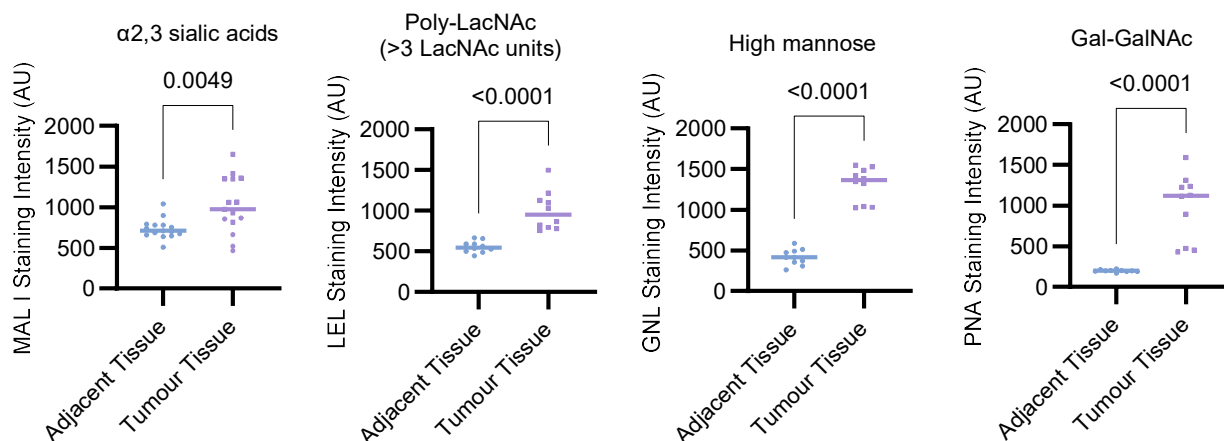

**Supplementary Fig. 6: Lectin staining for N-linked and O-linked glycan structures in tumor and adjacent decellularized TNBC patient tissues. a**, Schematic representing N-linked and O-linked glycan structures and their respective lectin binding partners. **b**, Representative images of matched adjacent and tumor TNBC patient tissue stained with Maackia Amurensis Lectin I (MALI), Fluorescein (FL-1311-2, 10µg/mL), Lycopersicon Esculentum (tomato) Lectin (LEL) Dylight 488 (DL-1174-1, 10µg/mL), Galanthus Nivalis Lectin (GNL) Fluorescein (FL-1241-2, 10µg/mL), and PNA From Arachis hypogaea (peanut), AlexaFluor 488 (L21409, 10µg/mL). Scale bar = 50µm. **c**, Quantitation of lectin staining intensity using IMARIS image analysis software. Median. Unpaired t test. N=2 matched patient tissues each, 5 FOV per tissue.

a

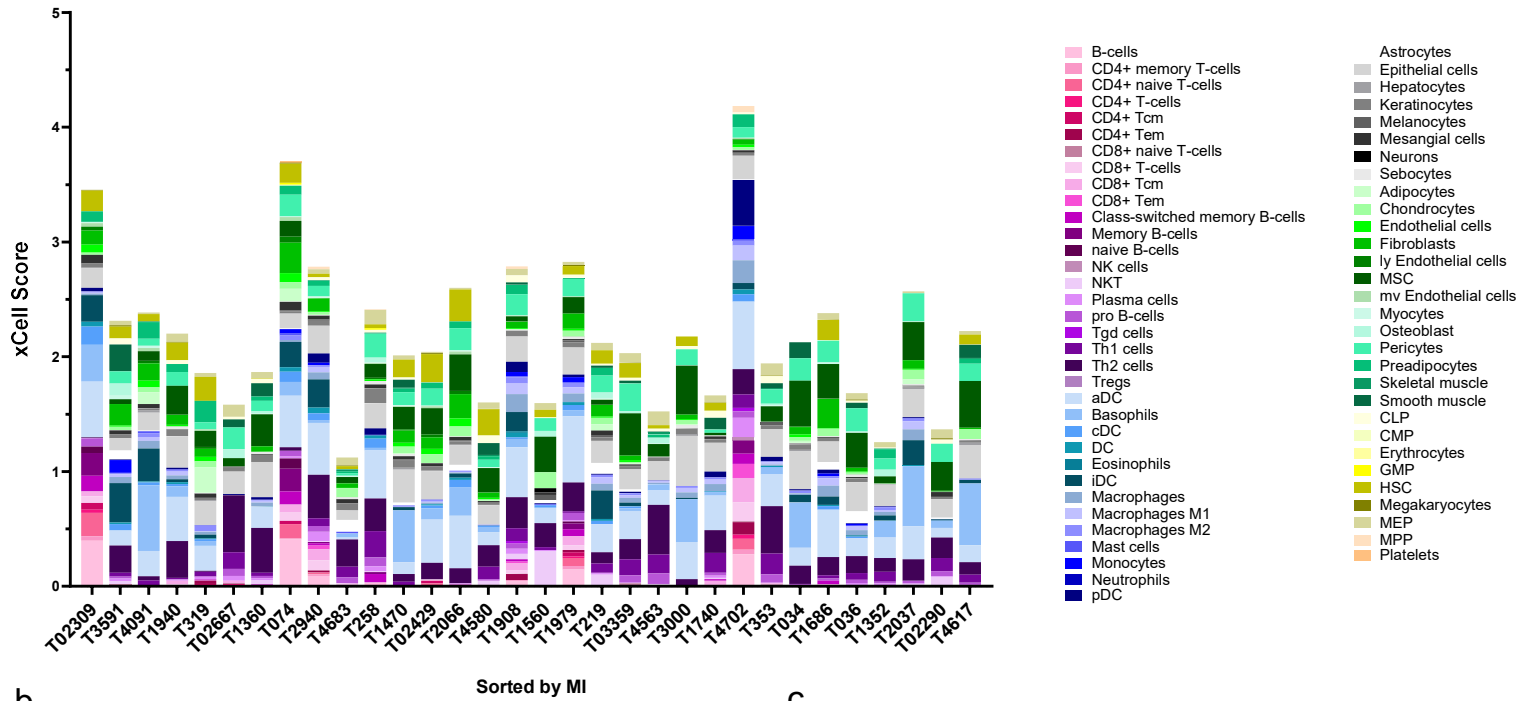

b

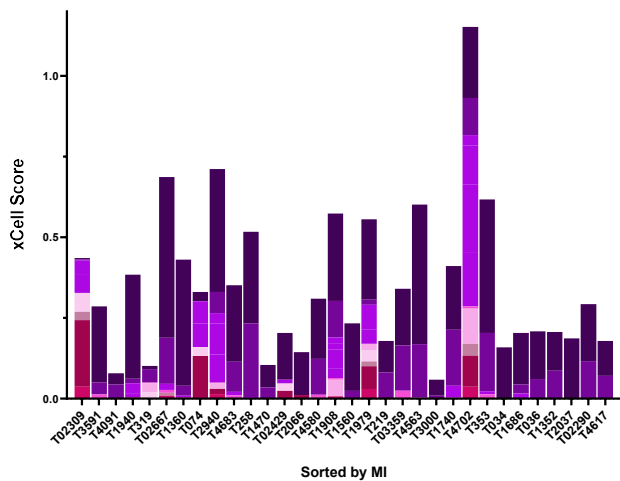

c

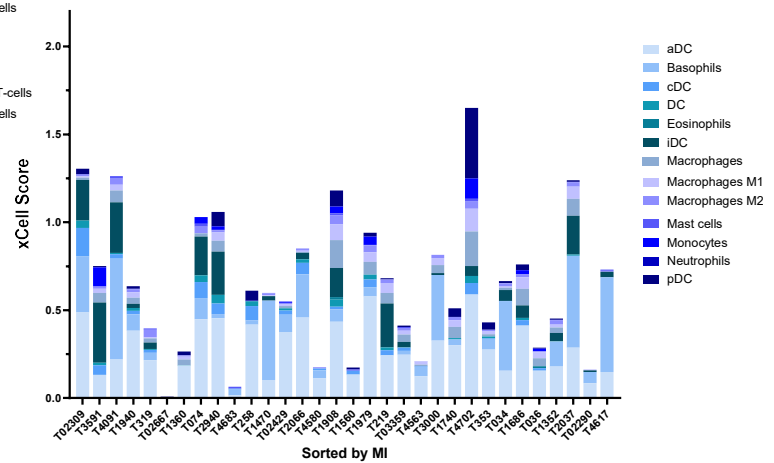

**Supplementary Fig. 7: xCell deconvolution of TNBC tumor tissues.** **a**, Stacked barchart of 64 xCell signatures for each patient tumor tissue. N=32. **b**, Stacked barchart of xCell lymphoid compartment signatures. N=32. **c**, Stacked barchart of xCell myeloid compartment signatures. N=32.

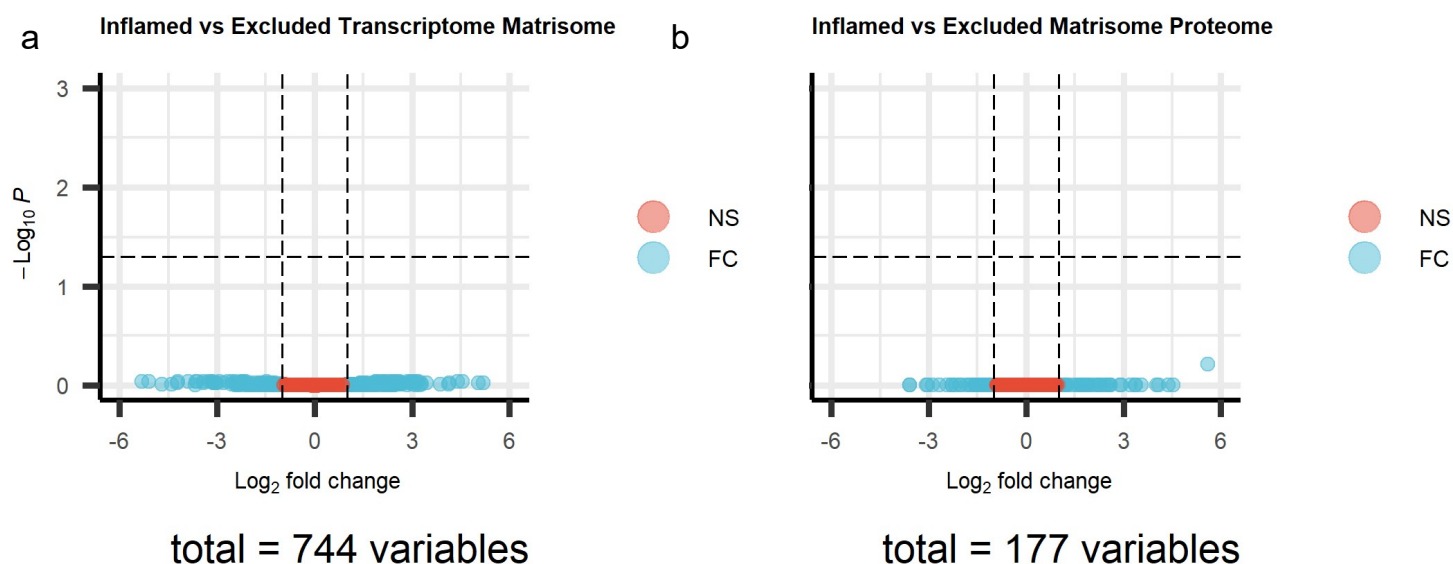

**Supplementary Fig. 8: No changes in matrisome transcriptome or proteome between inflamed and excluded samples.** **a**, Volcano plot of differentially regulated matrisome genes between inflamed and excluded tumor tissues. N=4 for excluded, N=3 for inflamed. **b**, Volcano plot of differentially regulated matrisome proteins between inflamed and excluded tumor tissues. N=4 for excluded, N=5 for inflamed.



## 1691 Tumor

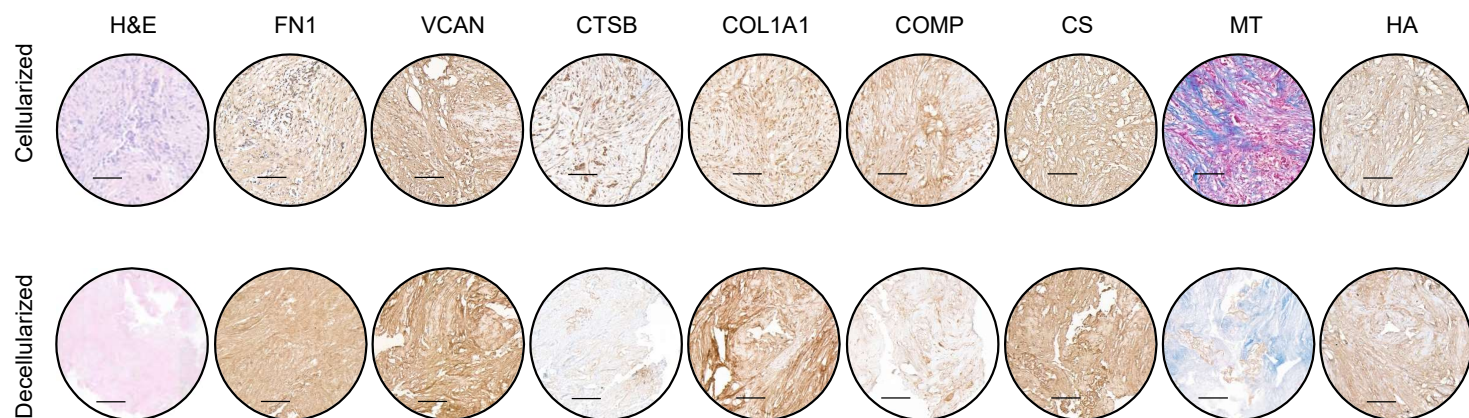

## 1691 Surround

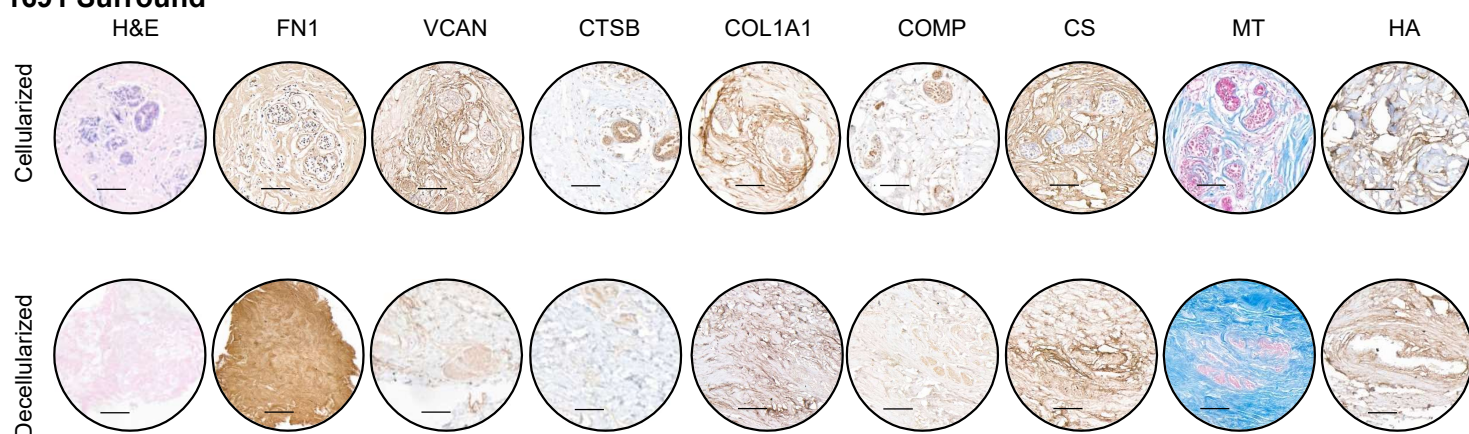

**Supplementary Fig. 9: Representative sections of IHC staining for matrix molecules in tumor and surround cellularized and decellularized TNBC patient tissues.** Stains included anti-FN1 (ab23750, 1:500), anti-VCAN (HPA004726, 1:200), anti-CTSB (ab58802, 1:400), anti-COL1A1 (HPA011795, 1:300), anti-COMP (ab11056, 1:80), anti-CS (ab11570, 1:600), Masson's Trichrome (MT), and anti-HA (385911, 1:100). Scale bar = 100µm.

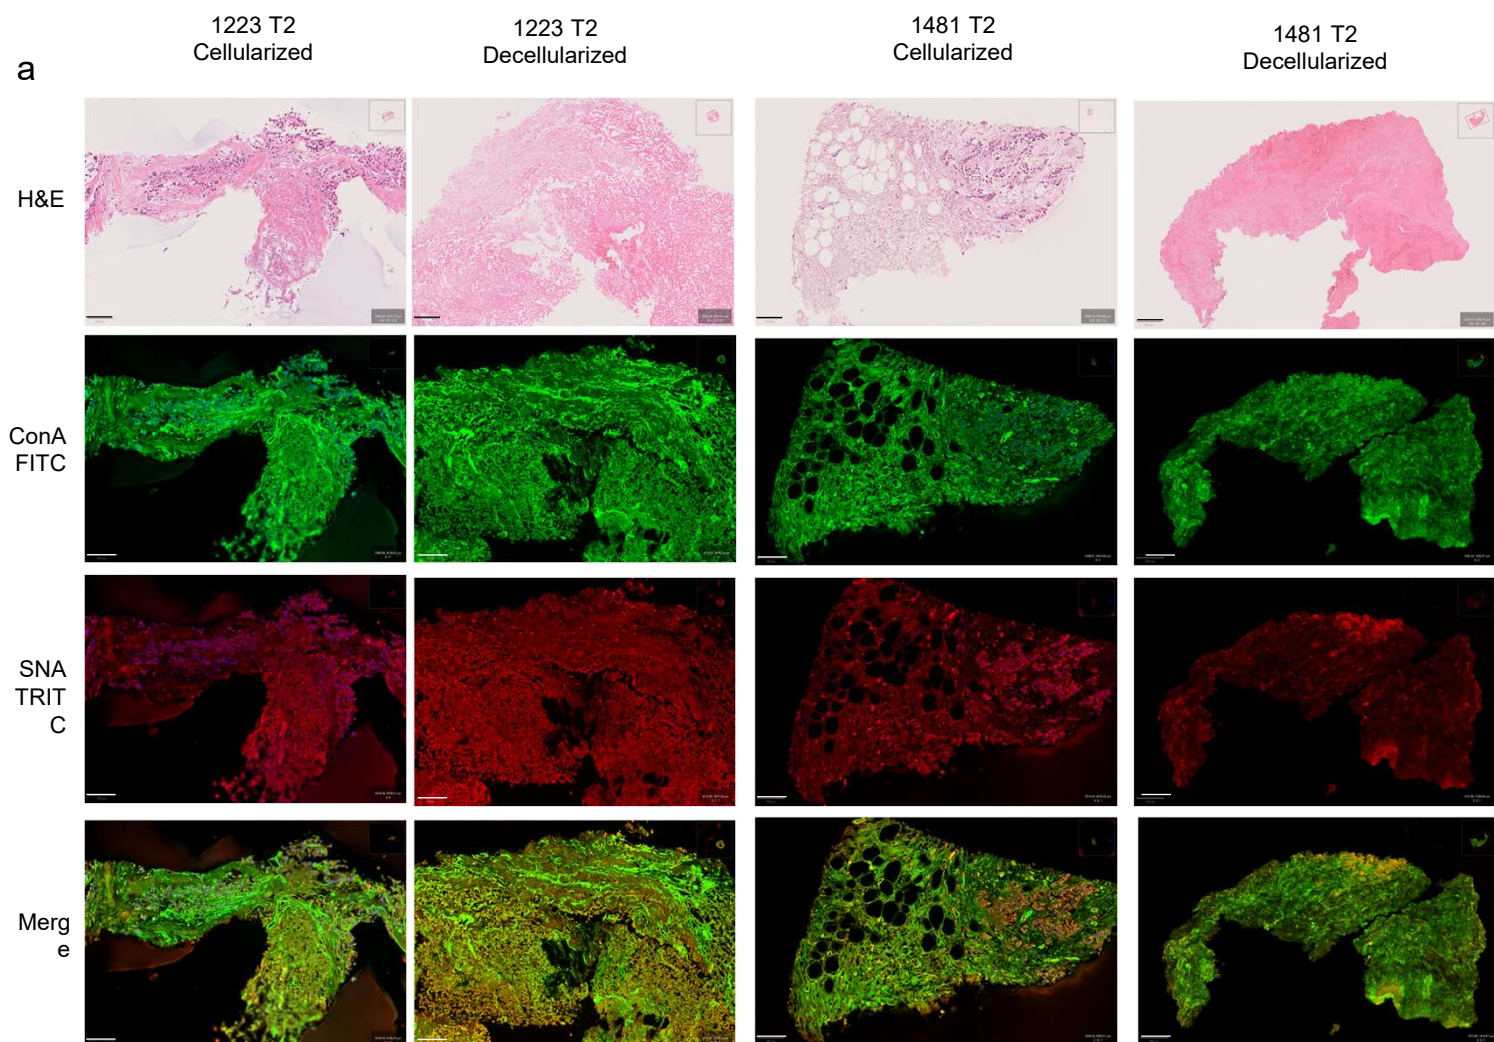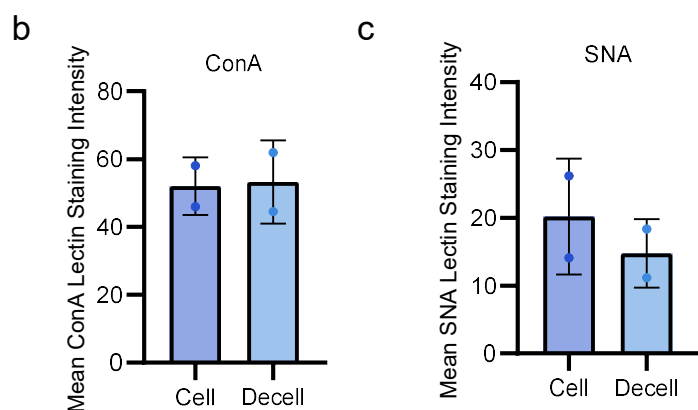

**Supplementary Fig. 10: Lectin staining confirms that decellularization does not affect N-linked and sialylated glycan structures in tumor and adjacent TNBC patient tissues.** **a**, Representative images of cellularized or decellularized adjacent or tumor tissue. H&E staining in the top row, staining of a consecutive section with Concavalin A (ConA) lectin conjugated to AF488 for all N-linked glycans in the second row (green) and Sambucus nigra (SNA) lectin conjugated to Cy3 for sialic acids in the third row (red). Scale bar = 100µm. **b-c**, Analysis of **b**, ConA-AF488 and **c**, SNA-Cy3 lectin staining intensity using QuPath. N=2 matched tissue donors for each group, paired T test.



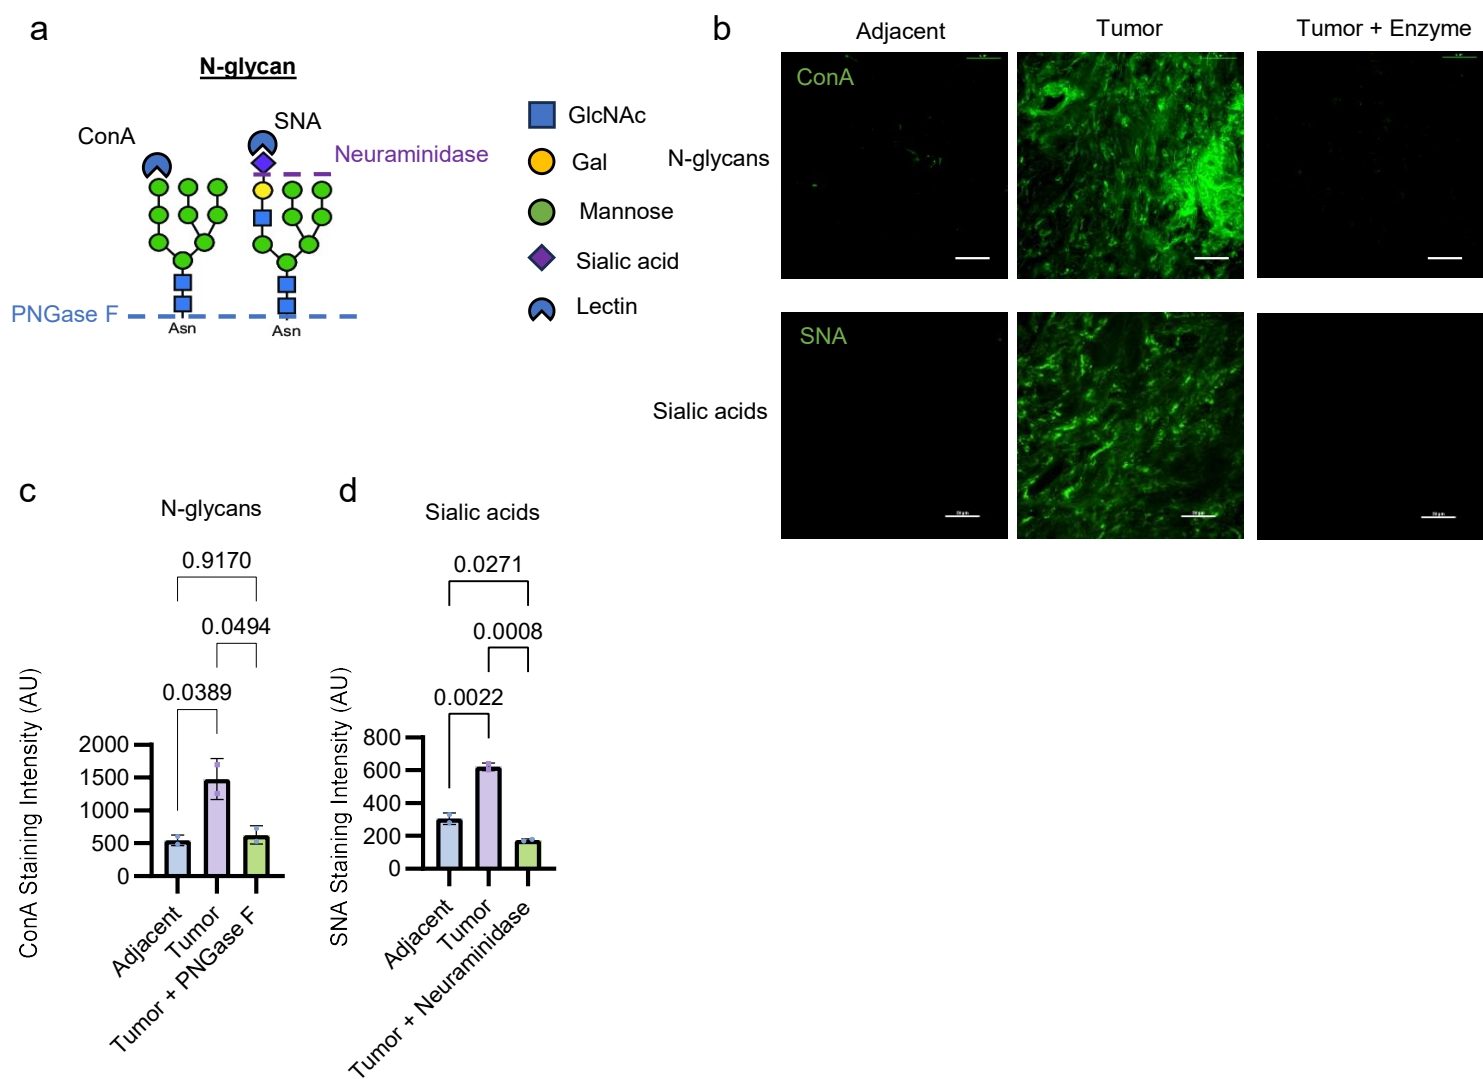

**Supplementary Fig. 11: Lectin staining for N-linked and sialylated glycan structures in tumor and adjacent TNBC patient tissues and their cleavage using PNGase F and neuraminidase.** **a**, Schematic of N-linked glycan enzymatic modifications and their respective lectin binding partners for staining. **b**, Representative images of adjacent, tumor, and tumor treated with PNGase F or neuraminidase. Staining with Concavalin A (ConA) lectin conjugated to AF488 for all N-linked glycans in the top row (green) and Sambucus nigra (SNA) lectin conjugated to AF488 for sialic acids in the bottom row (green). Scale bar = 100µm. **c-d**, Analysis of **c**, ConA-AF488 and **d**, SNA-AF488 lectin staining intensity using IMARIS image analysis software. N=2 matched tissue donors for each group, 5 FOV per tissue, One-way ANOVA with Tukey's post-hoc test.

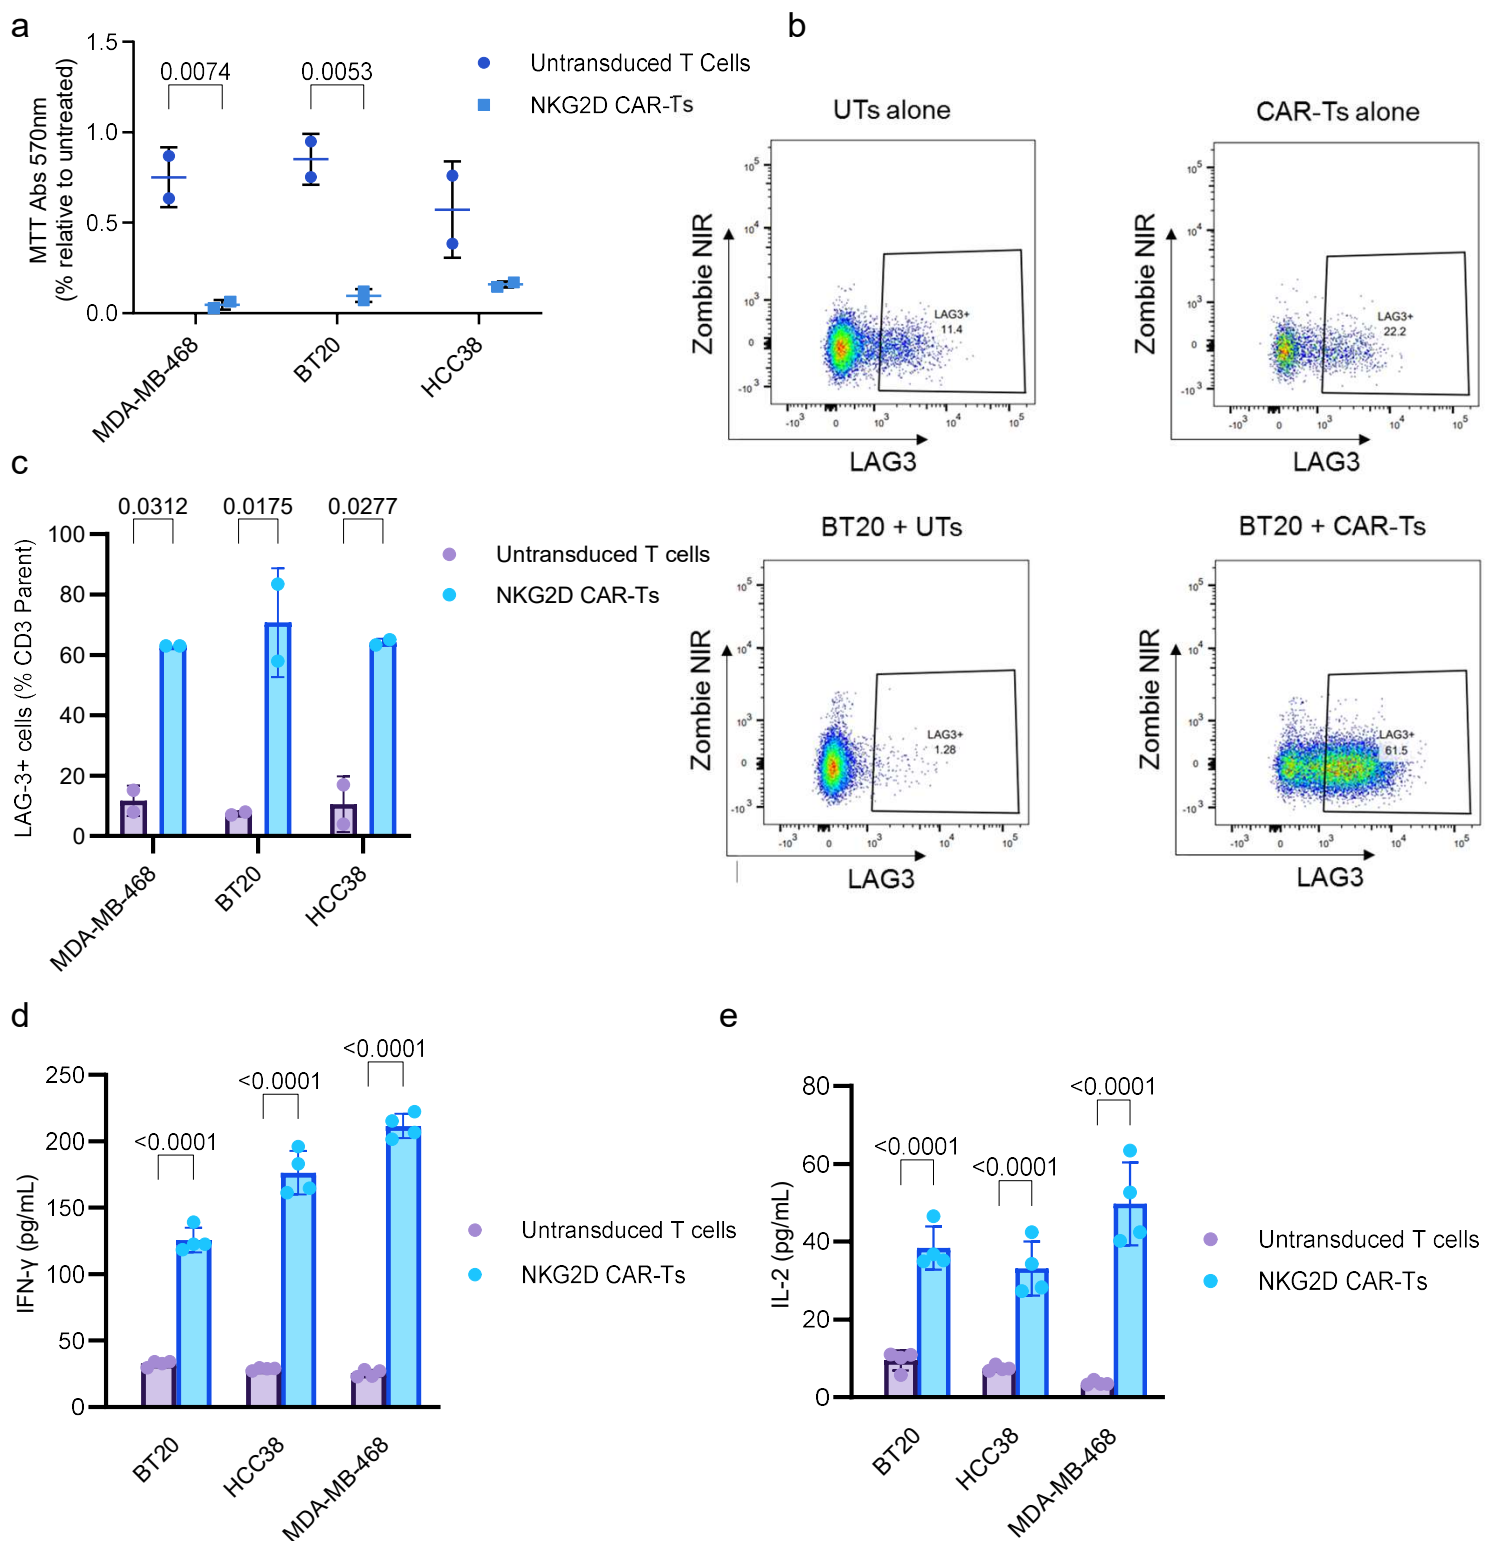

**Supplementary Fig. 12: CAR-T targeting of TNBC cell lines in 2D.** **a**, MTT assay with three TNBC cell lines, MDA-MB-468, BT20 and HCC38 co-cultured with untransduced T cells or CAR-Ts targeting NKG2D. Mean with SD. Two-way ANOVA with Šídák's multiple comparisons test. N=2. **b**, Representative flow cytometry plots. **c**, Bar plots of flow cytometry expression patterns of LAG3 expression, shown as percentage of CD3+ parent cells. Mean with SD. Two-way ANOVA with Šídák's multiple comparisons test. N=2. **d-e**, ELISA was performed to detect secretion of **d**, IFN-γ and **e**, IL-2 by NKG2D-targeting CAR-Ts. Mean with SD. Two-way ANOVA with Šídák's multiple comparisons test. N=4.

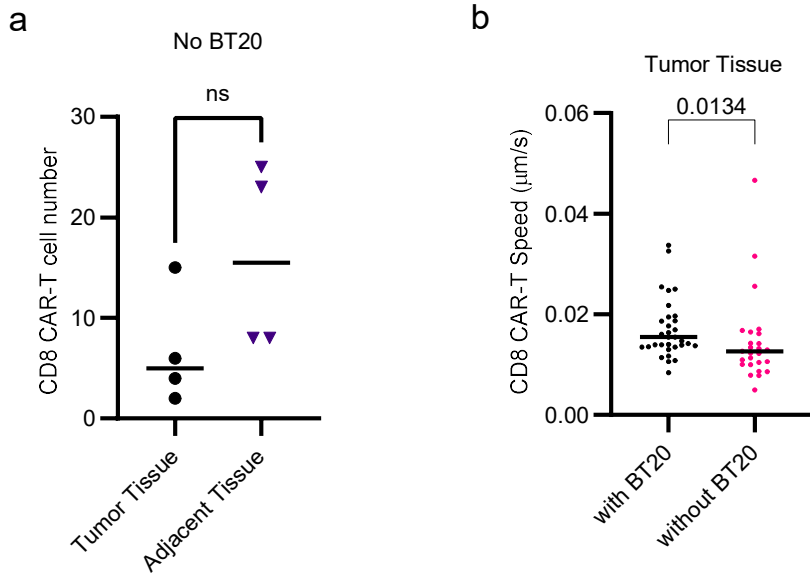

**Supplementary Fig. 13: Decellularized tissue timelapse video analysis. a-b,** Timelapse confocal microscopy of NKG2D-targeting CAR-Ts in decellularized tissues which were not seeded with BT20 TNBC cells. **a,** Mean CD8 NKG2D-targeting CAR-T cell number per field of view (FOV). Line at median. Unpaired t test. N=4. **b,** Mean speed of CD8+ CAR-Ts. Line at median. Mann Whitney test. N=4.

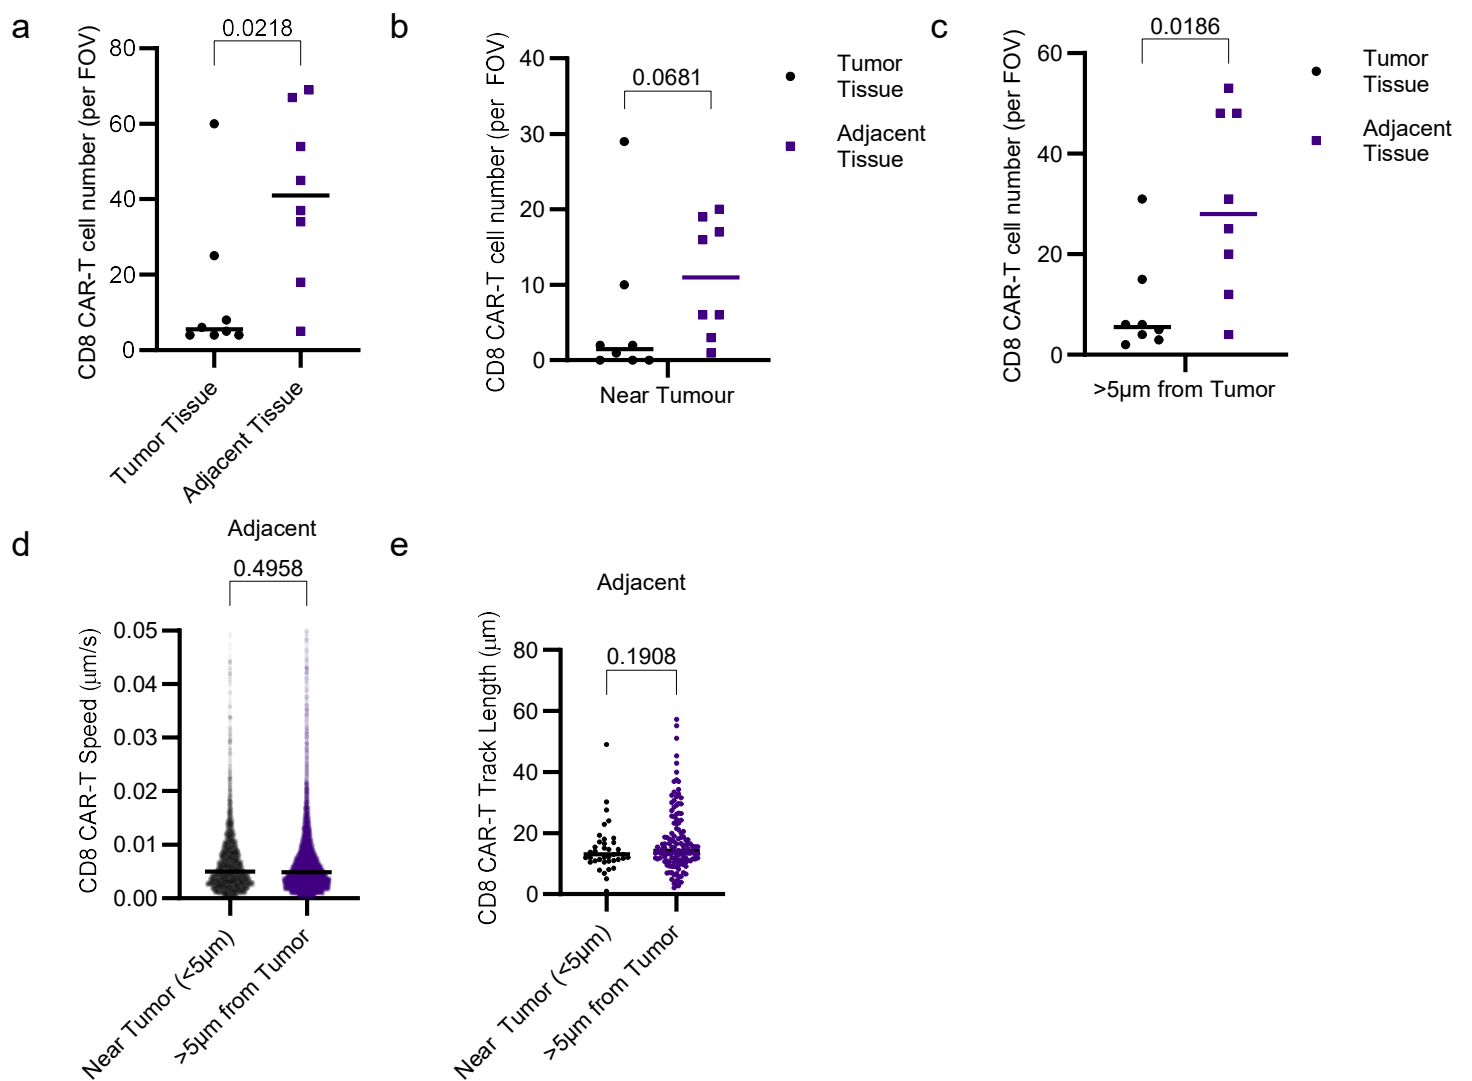

**Supplementary Fig. 14: Decellularized tissue timelapse video analysis.** Fluorescence-based live confocal timelapse imaging assay using decellularized tissue seeded with BT20 TNBC cells and NKG2D-targeting CAR-T co-culture. Tissues stained with anti-human CD326 (EpCAM) AlexaFluor (AF) 488 (53-8326-42, 1:10) anti-human CD8-AF647 (344725, 1:10) and anti-human fibronectin conjugated to Dylight 405 (F3648, 1:10). Video analysis performed using IMARIS analysis software. **a**, CD8+ CAR-T cell number per field of view (FOV) in tumor and adjacent tissue. **b**, CD8+ CAR-T cell number per field of view (FOV) near EpCAM+ tumor cells (<5μm) in tumor and adjacent tissue. **c**, CD8+ CAR-T cell number per field of view (FOV) >5μm from tumor cells in tumor and adjacent tissue. **d**, CD8+ CAR-T cell speed (μm/s) >5μm from tumor cells and **e**, CD8+ CAR-T cell track length (μm) >5μm from tumor cells in adjacent tissue. **a-e**, Line at median. Mann-Whitney test. N=4, with 2 technical replicates each.

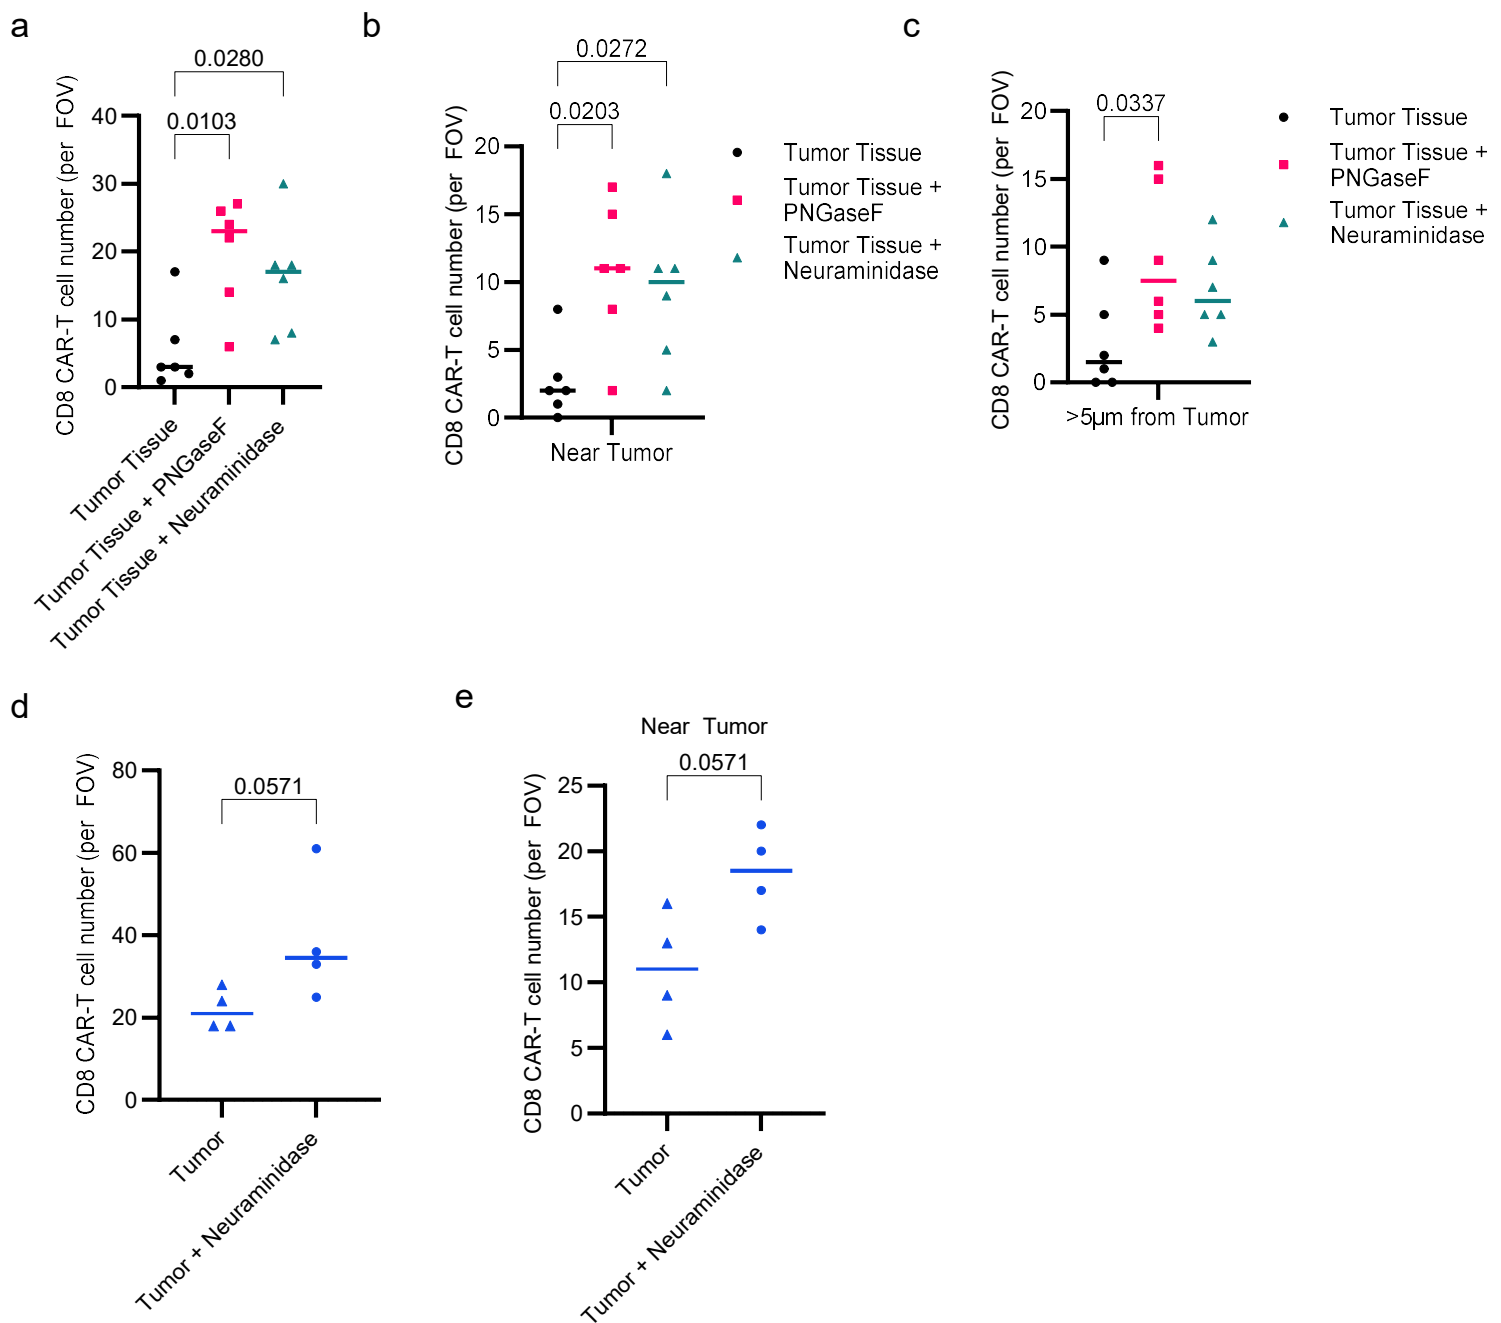

**Supplementary Fig. 15: Decellularized tissue timelapse video analysis.** Fluorescence-based live confocal timelapse imaging assay using decellularized tumor tissue treated with either PNGase F or neuraminidase enzyme treatment, seeded with BT20 TNBC cells and NKG2D-targeting CAR-T co-culture. Tissues stained with anti-human CD326 (EpCAM) AlexaFluor (AF) 488 (53-8326-42, 1:10) anti-human CD8-AF647 (344725, 1:10) and anti-human fibronectin conjugated to Dylight 405 (F3648, 1:10). Video analysis performed using IMARIS analysis software. **a**, CD8+ CAR-T cell number per field of view (FOV). **b**, CD8+ CAR-T cell number per field of view (FOV) near EpCAM+ tumor cells (<5 $\mu$ m). **c**, CD8+ CAR-T cell number per field of view (FOV) >5 $\mu$ m from tumor cells. **a-c**, Line at median. One-way ANOVA with Holm-Šídák's multiple comparisons test. N=3, with 2 technical replicates each. **d-e**, MUC1-targeting CAR-T added to BT20-seeded decellularized tumor tissue. **d**, Mean CD8 MUC1-targeting CAR-T cell number per FOV. Line at median. Mann Whitney test. N=4. **e**, Mean CD8 MUC1-targeting CAR-T cell number near tumor (<5 $\mu$ m) per FOV. Line at median. Mann Whitney test. N=4.

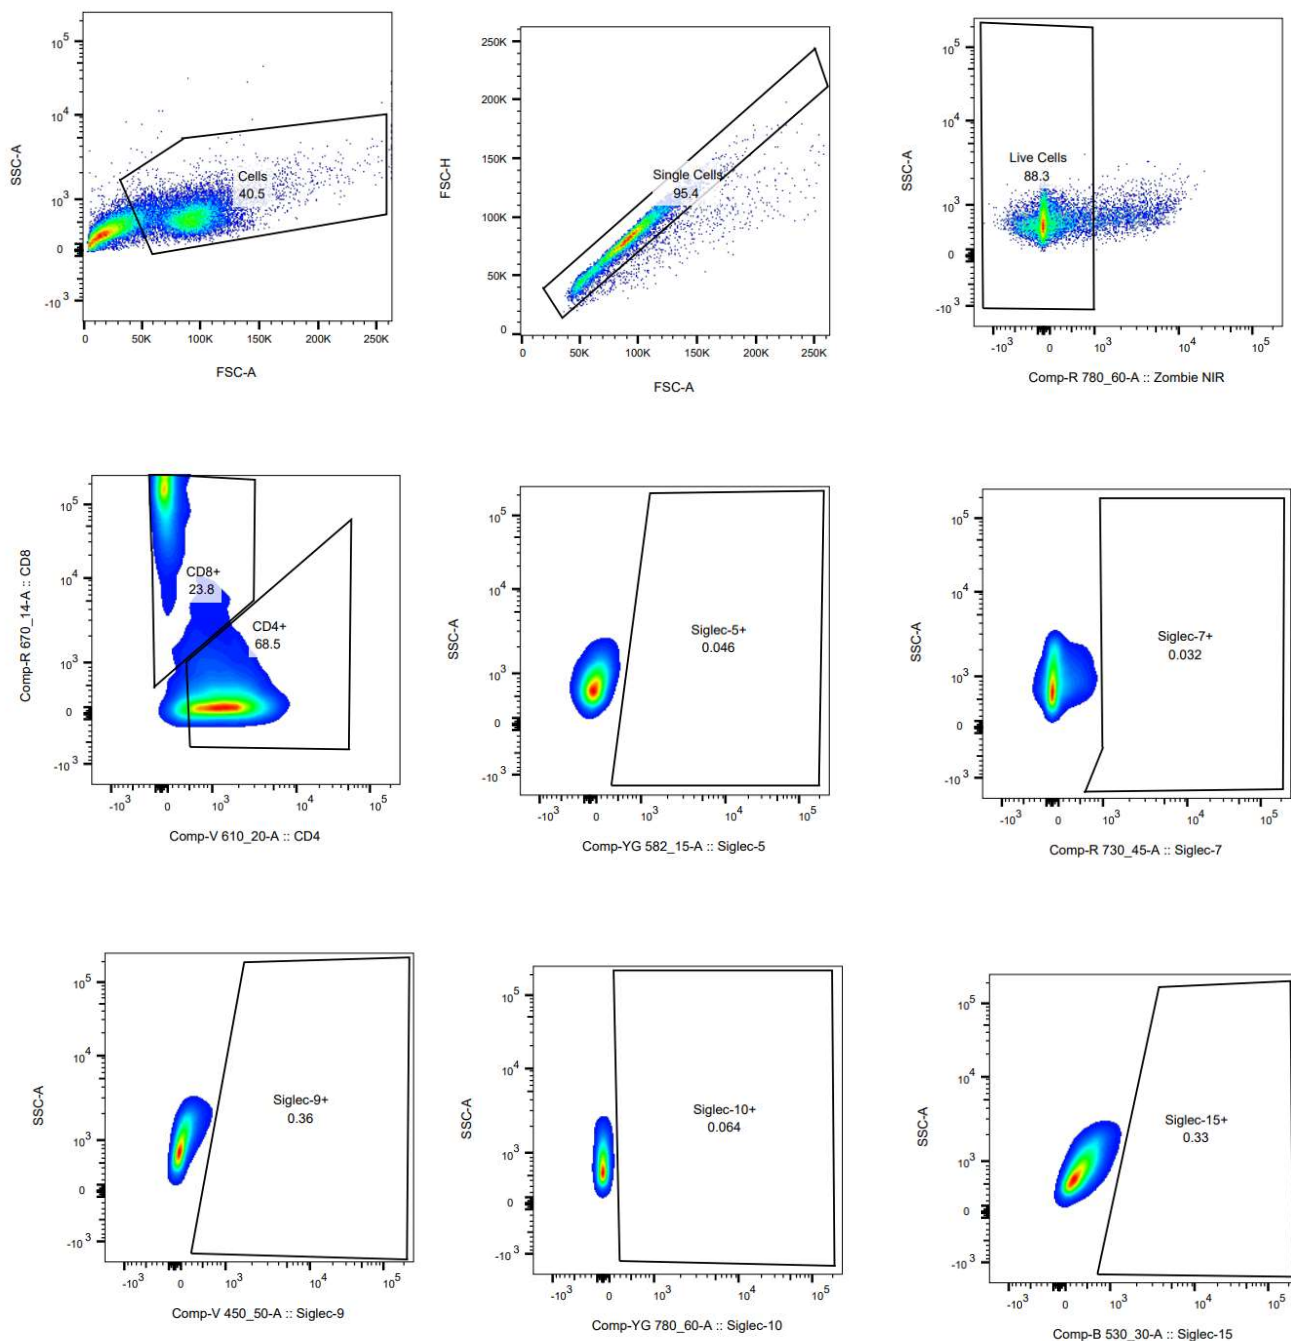

**Supplementary Fig. 16: Flow gating strategy and fluorescence minus one (FMO) controls for CAR-T cell Siglec flow cytometry panel.** CD4+ and CD8+ CAR-T cells assessed for Siglec expression using flow cytometry after five days. Cells were either cultured alone or co-cultured for five hours with BT20-seeded decellularized tumor tissue or tumor tissue treated with neuraminidase then transferred to a tissue culture plate for five days. N=3.

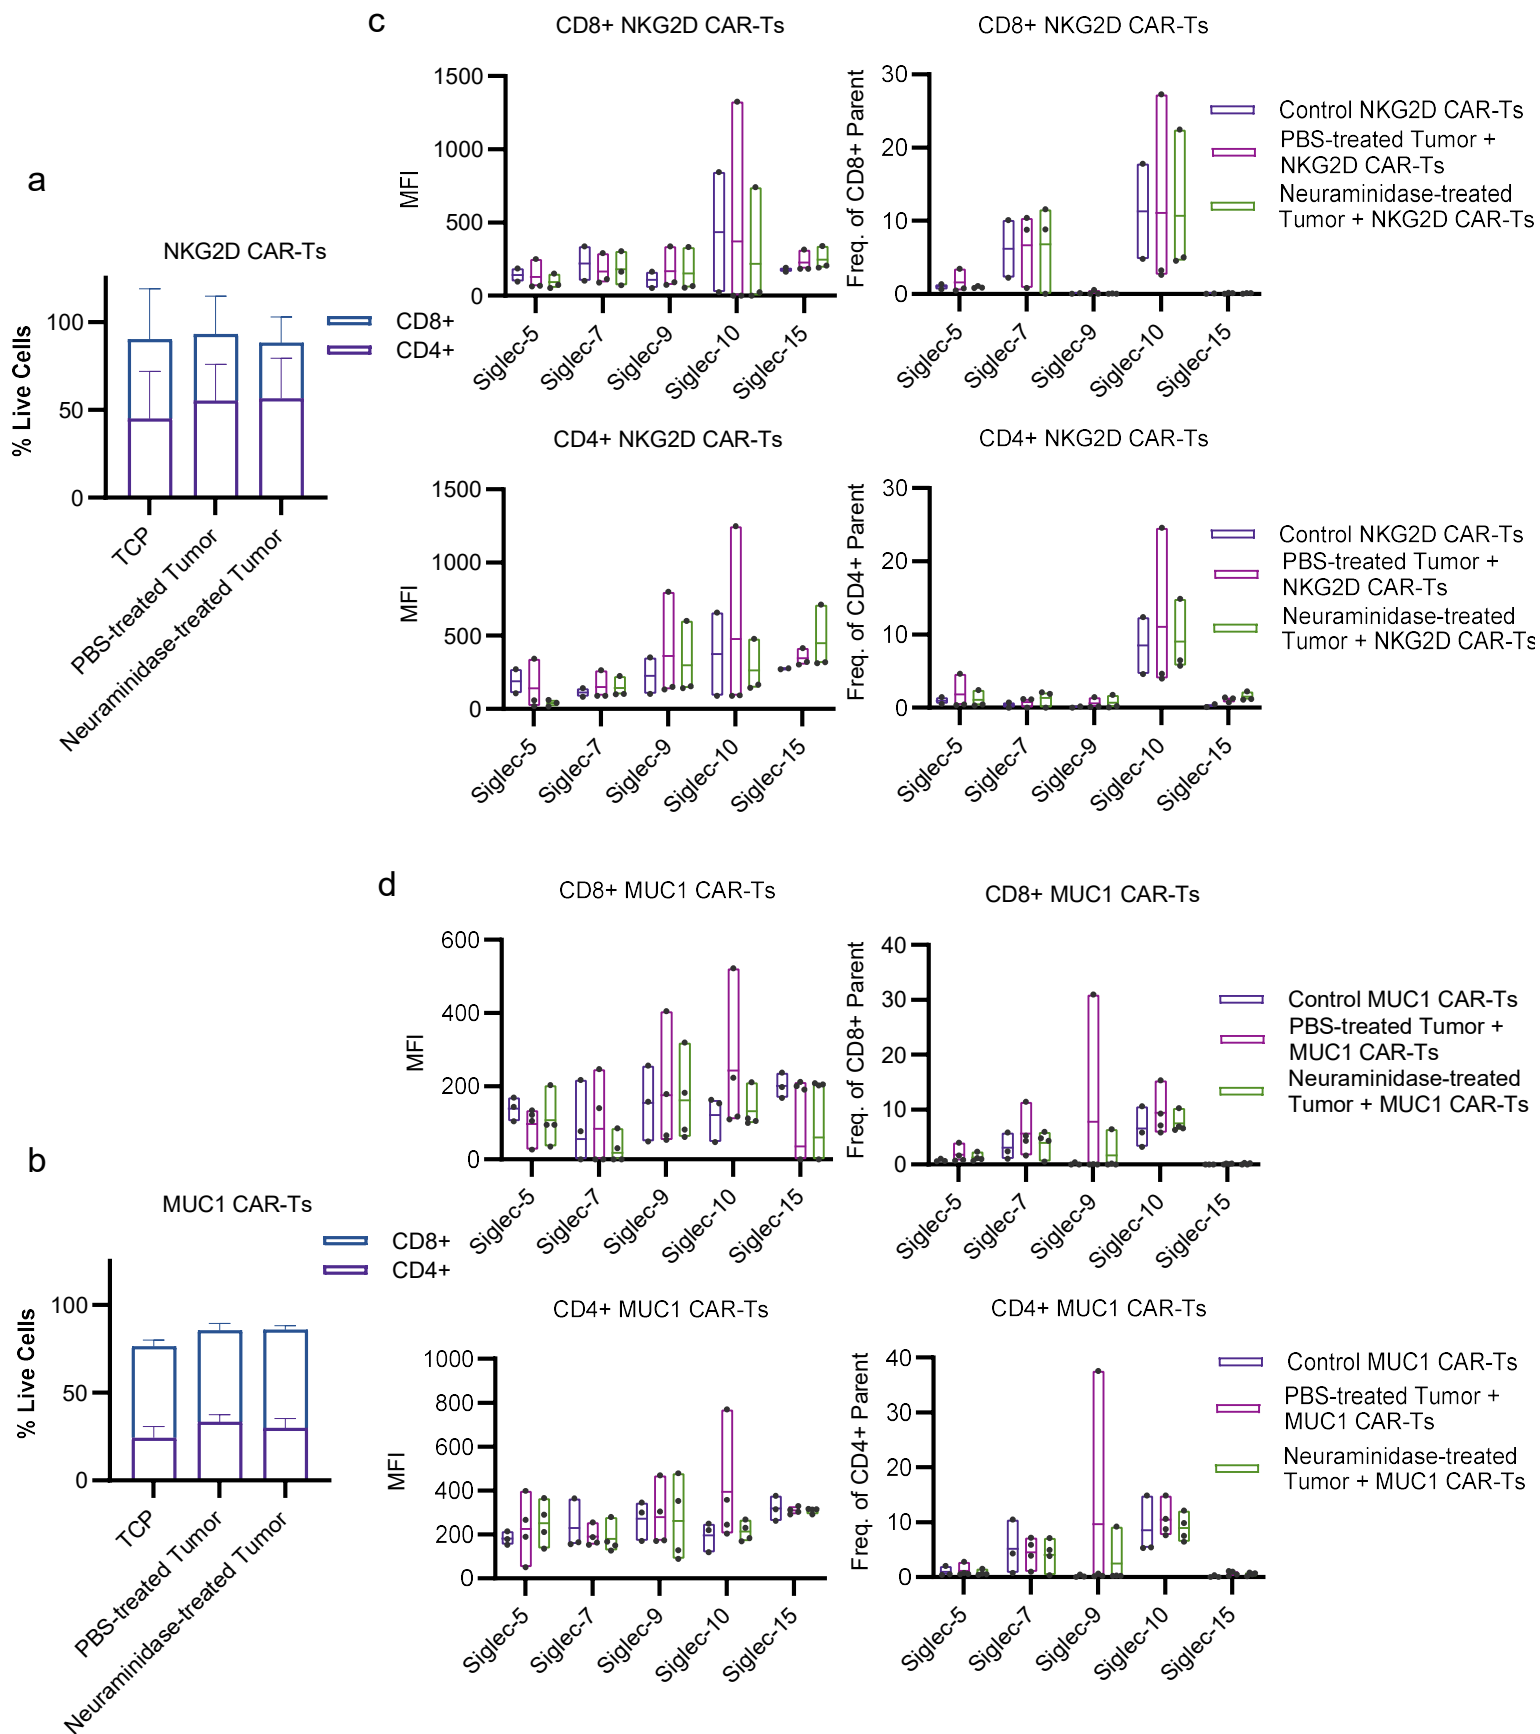

**Supplementary Fig. 17: Neuraminidase treatment does not affect Siglec expression on CAR-Ts.** **a-b**, Bar plots of flow cytometry expression patterns of CD8 and CD4 expression, shown as percentage of live cell population. **a**, NKG2D-targeting or **b**, MUC-1-targeting CAR-Ts cultured on tissue culture plastic (TCP), PBS-treated TNBC decellularized tumor tissue or neuraminidase-treated tumor tissue after five days. Mean with SD. Two-way ANOVA with Šídák's multiple comparisons test. N=3. **c-d**, Box plots of flow cytometry expression for a panel of Siglec receptors (Siglec-5, Siglec-7, Siglec-9, and Siglec-10) for **c**, NKG2D-targeting or **d**, MUC-1 targeting CAR-Ts. Line at median. Two-way ANOVA with Tukey's multiple comparisons test. N=2-4.



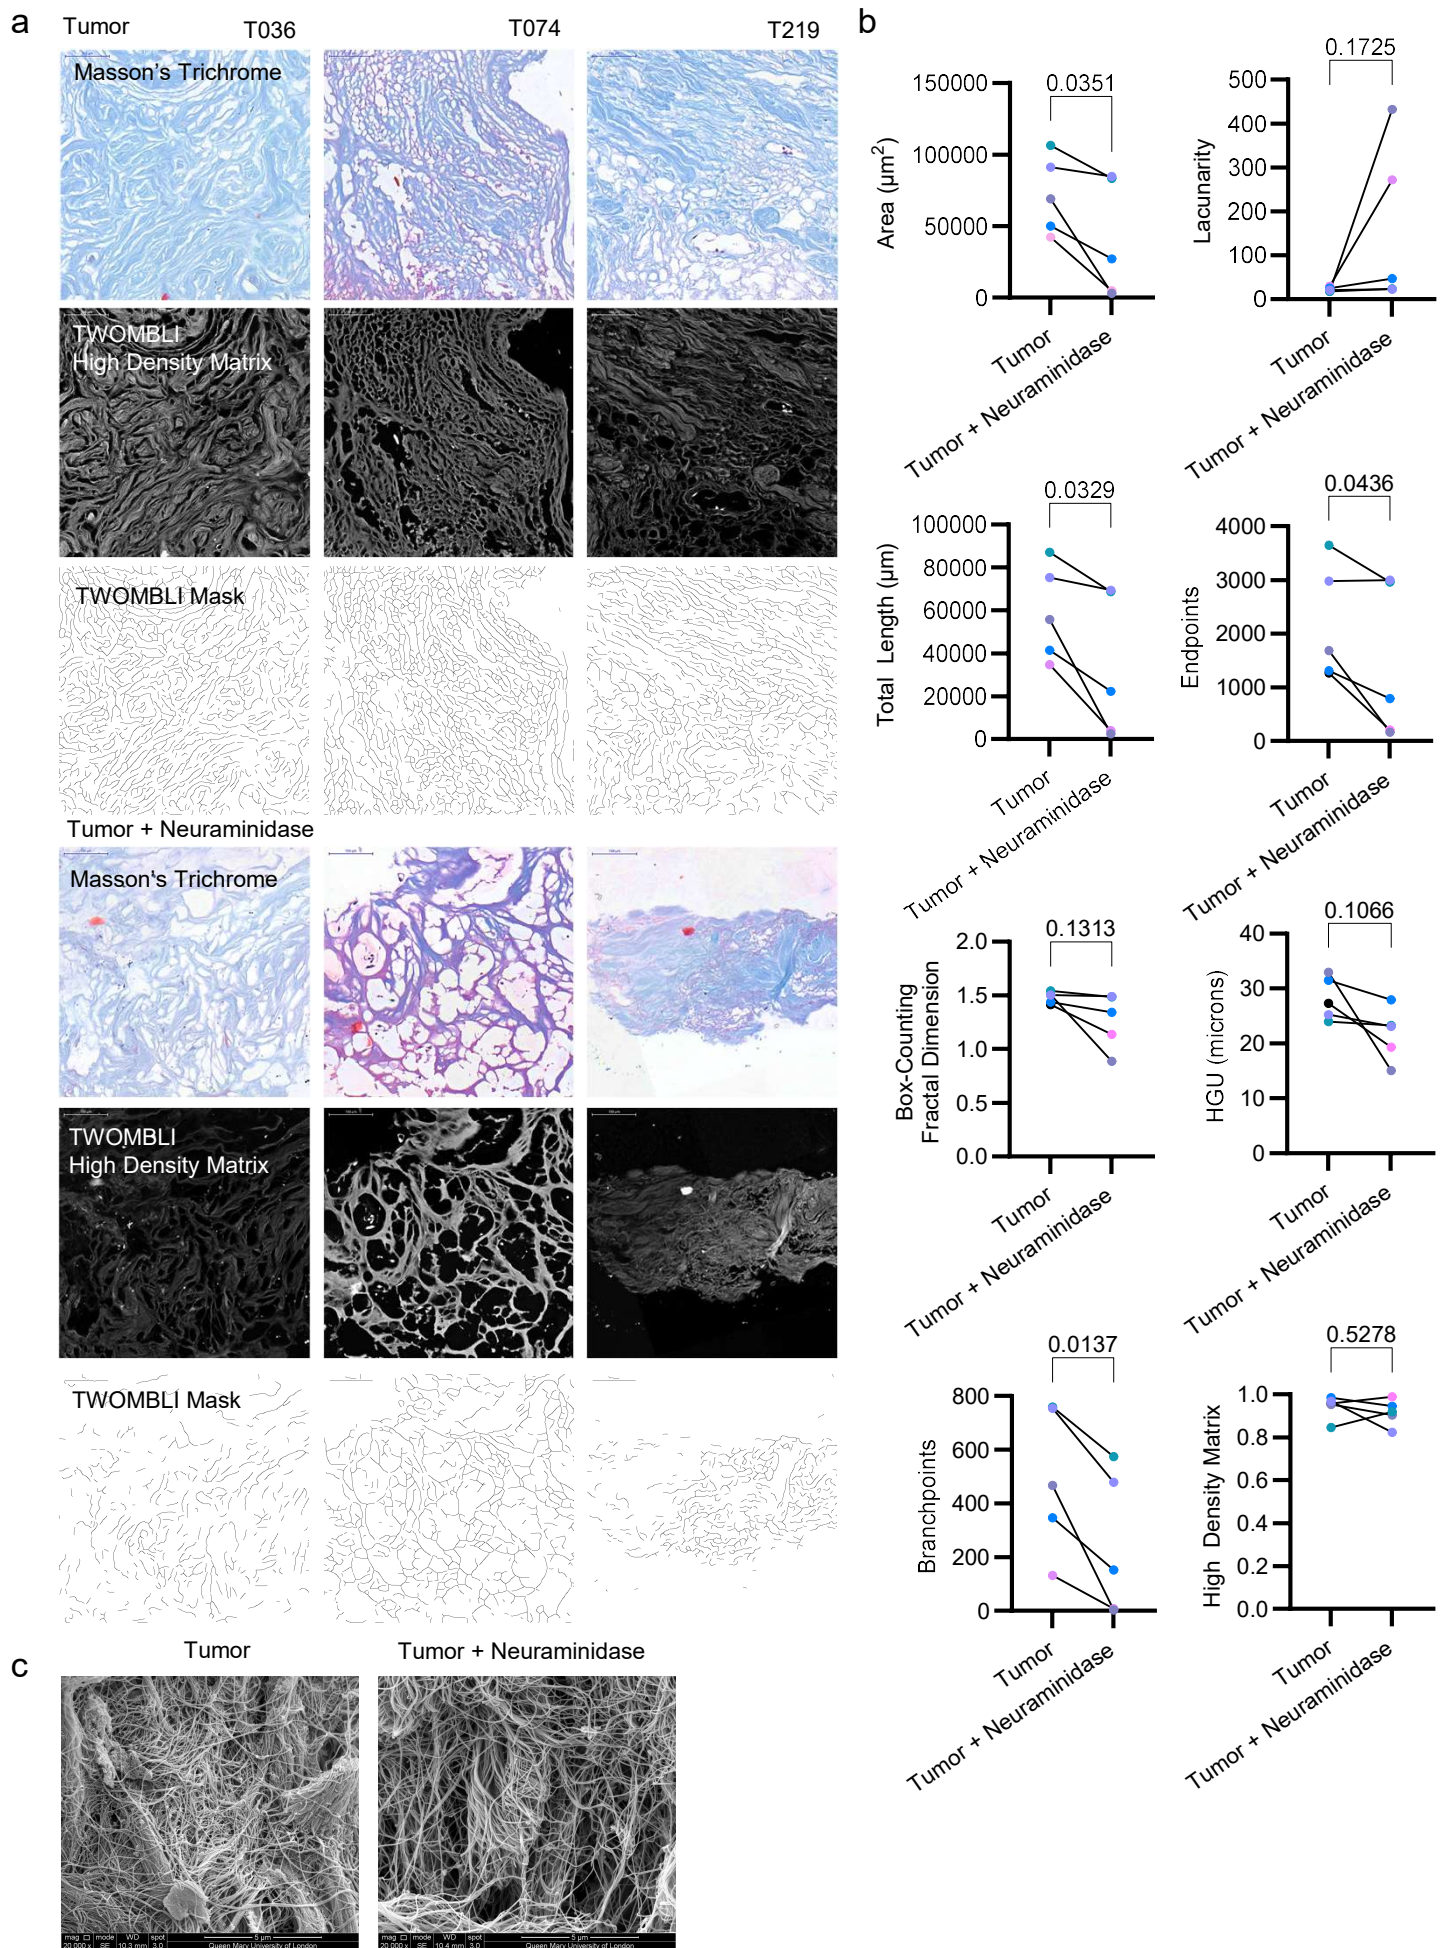

**Supplementary Fig. 18: Glycan cleavage enzymes alter tissue architecture.** **a**, Representative images of Masson's Trichrome staining & TWOMBLI analysis performed on matched tumor tissue treated with PBS or neuraminidase. Scale bar = 100µm. **b**, TWOMBLI analysis. Two-tailed paired t test. N=5 matched tumor & neuraminidase-treated tumor tissues. **c**, Representative scanning electron microscopy (SEM) images on matched tumor tissue treated with PBS or neuraminidase. Scale bar = 5µm.



**a** Tumor

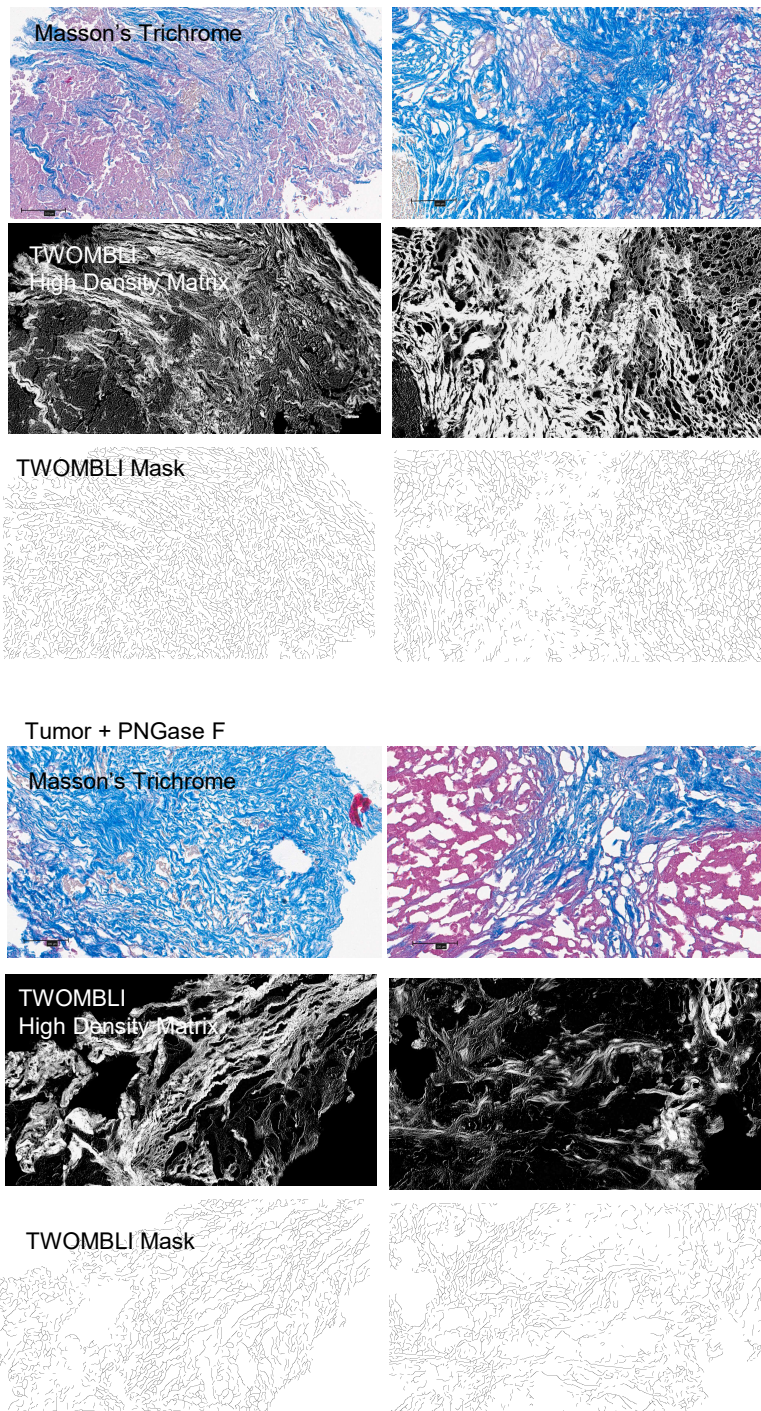

**b**

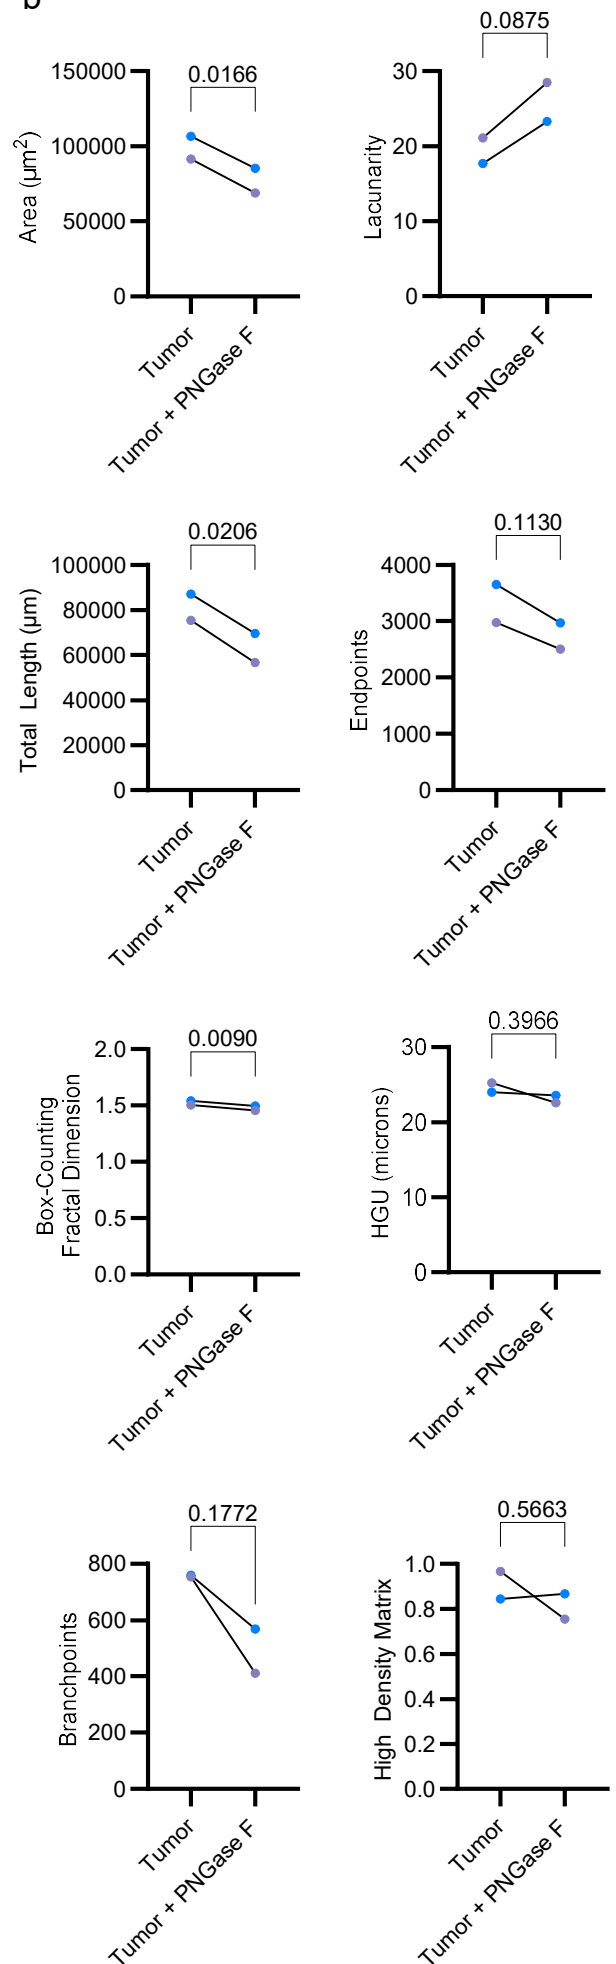

**Supplementary Fig. 19: Glycan cleavage enzymes alter tissue architecture. a,** Representative images of Masson's Trichrome staining & TWOMBLI analysis performed on matched tumor tissue treated with PBS or PNGase F. Scale bar = 100µm. **b,** TWOMBLI analysis. Two-tailed paired t test. N=2 matched tumor & PNGase F-treated tumor tissues.

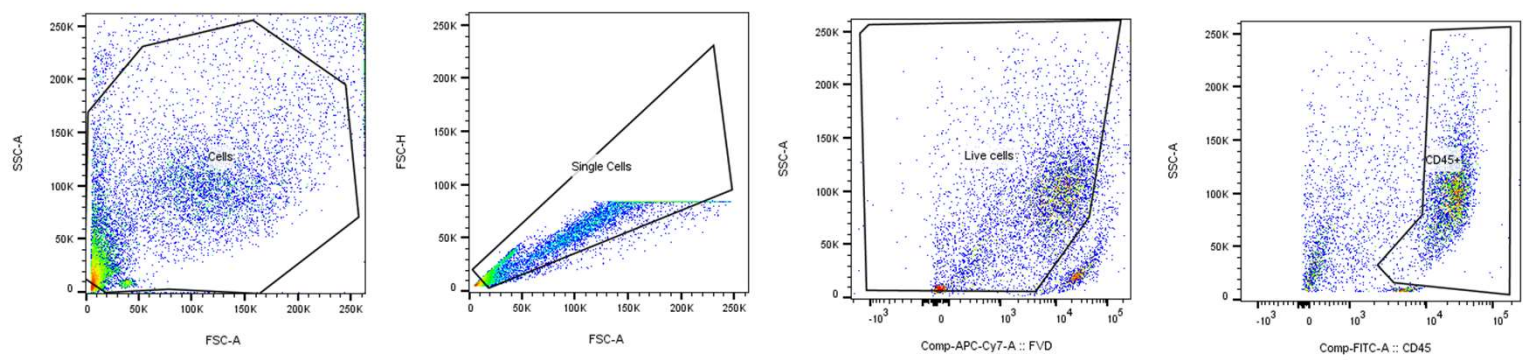

**Supplementary Fig. 20.** Flow gating strategy for macrophage flow cytometry assay. CD45<sup>+</sup> macrophages as assessed using flow cytometry after 14 days culture on adjacent or tumor tissue with or without neuraminidase treatment (Figure 7). N=3.

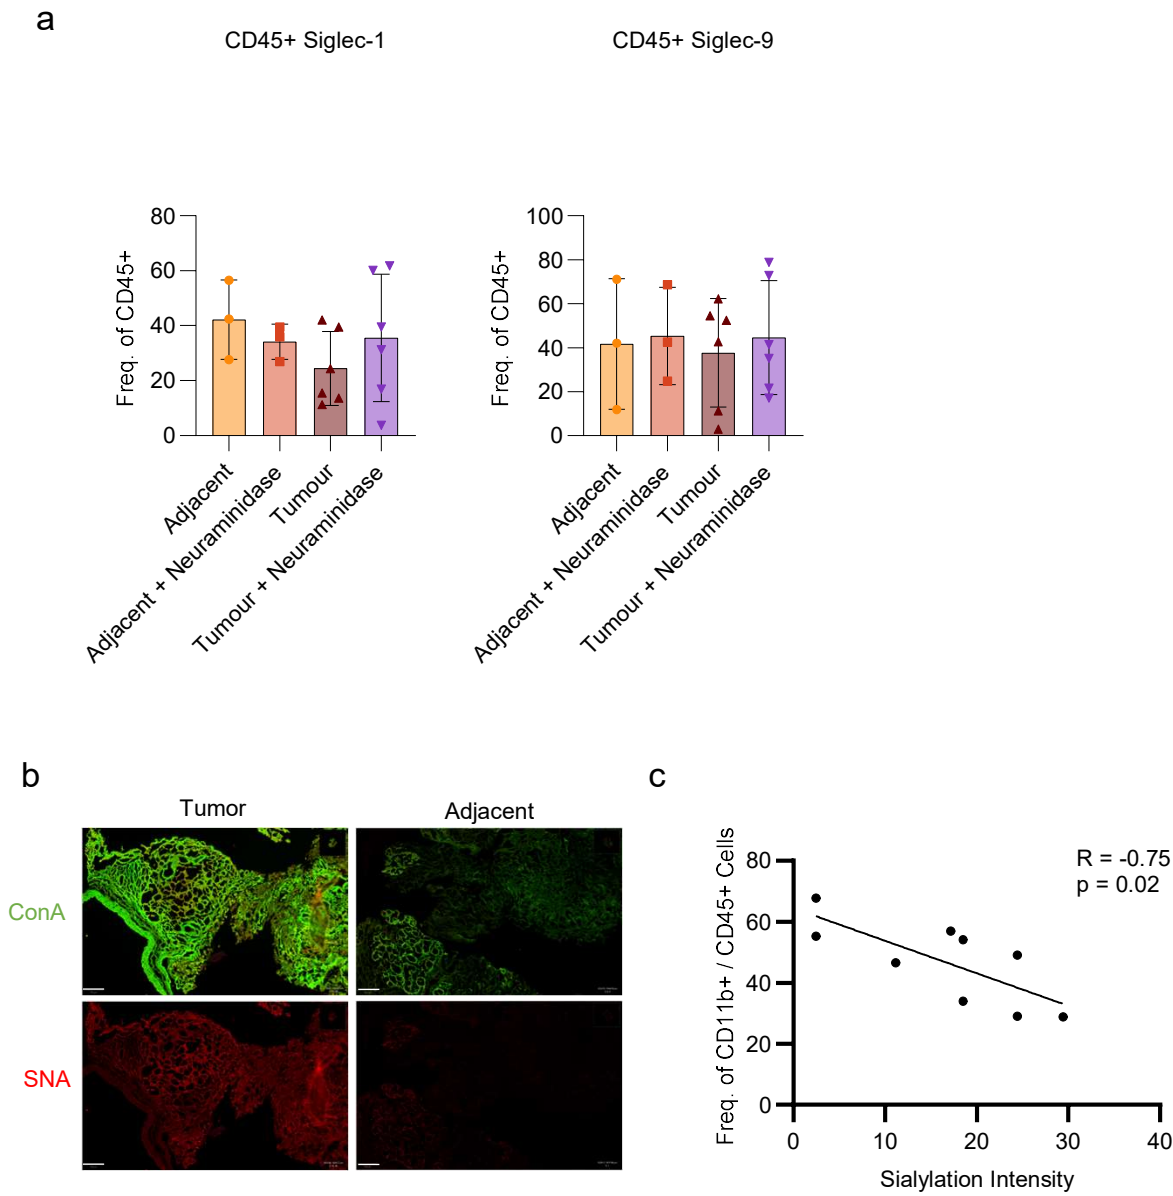

**Supplementary Fig. 21. Macrophages educated on patient tissue express Siglec-1 and Siglec-9 and tissue sialylation correlated with CD11b+ macrophage population educated on matched tissues. a**, Barchart of flow cytometry expression patterns of Siglec-1 and Siglec-9 shown as percentage positive cells from the CD45+ population. Line at mean with standard deviation error bars. Mixed-effects analysis with Tukey's multiple comparisons test. N=3 (N=2 adjacent, N=6 tumor, N=3 blood cones). **b**, Representative images of tumor and adjacent decellularized tissue stained with Concavalin A (ConA) lectin (green) for N-linked glycans, and Sambucus Nigra (SNA) lectin (red) for sialic acids. Scale bar = 100µm. **c**, Pearson's r values for correlation between SNA sialylation intensity of tissue and percentage positive cells from the CD45+ population educated on the tissue. N=9.

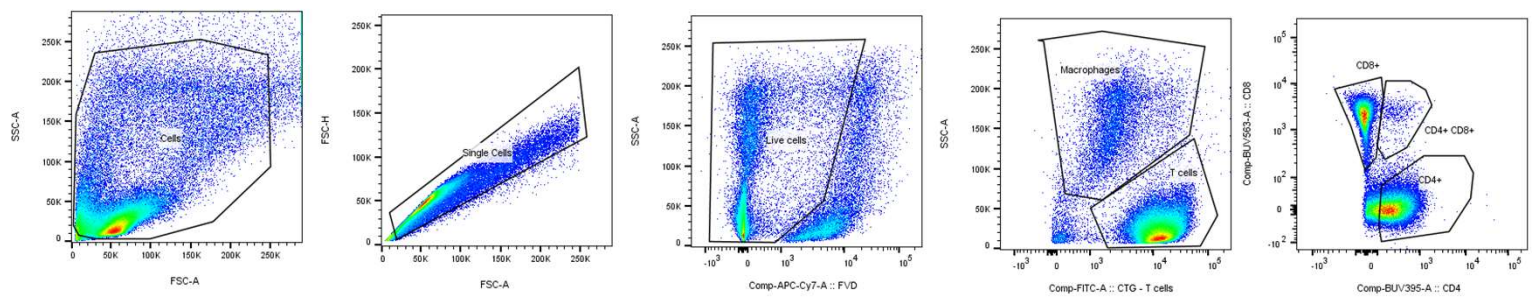

**Supplementary Fig. 22. Flow gating strategy for T cell flow cytometry assay.** T cells as assessed using flow cytometry after 2 days culture in co-culture with MAMs (Figure 8). N=3.

a

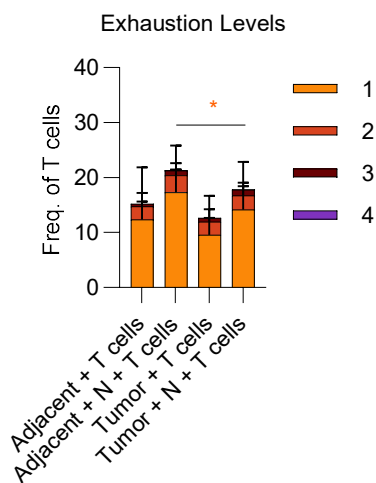

b

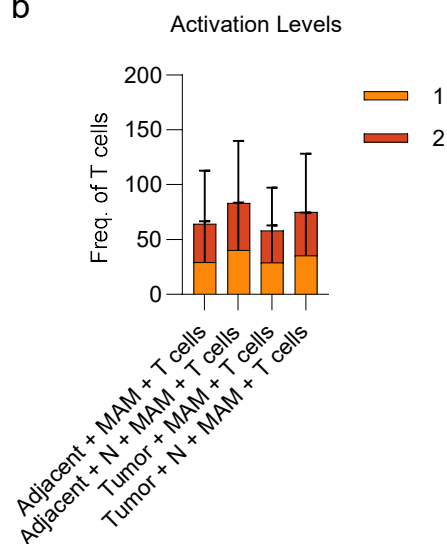

**Supplementary Fig. 23. MAMs influence T cell phenotype in a glycan-dependent manner.** Stacked bar charts of combinatorial gating for **d**, exhaustion markers (PD1, LAG3, TIM3) or **f**, activation markers (ICOS & CD137) shown as percentage positive cells expressing one marker, two markers, three, or four markers from the T cell population. Line at mean with standard deviation error bars. Mixed-effects analysis with Tukey's multiple comparisons test. N=3 (N=2 adjacent, N=2 tumor, N=3 blood cones).
